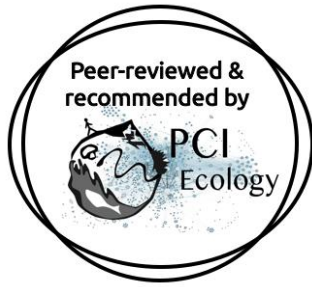

## **Deleterious effects of thermal and water stresses on life history and physiology: a case study on woodlouse**

5 Charlotte DEPEUX,<sup>1, 2</sup>, Angèle BRANGER<sup>1</sup>, Théo MOULIGNIER<sup>1</sup>, Jérôme MOREAU<sup>3</sup>, Jean-  
6 François LEMAÎTRE<sup>2</sup>, François-Xavier DECHAUME-MONCHARMONT<sup>4</sup>, Tiffany LAVERRE<sup>1</sup>,  
7 Hélène PAUHLAC<sup>1</sup>, Jean-Michel GAILLARD<sup>2</sup>, Sophie BELTRAN-BECH<sup>1</sup>

8

9 <sup>1</sup> Université de Poitiers, Laboratoire Ecologie et Biologie des interactions EBI, UMR CNRS 7267,  
10 3, rue Jacques Fort, TSA 51106 86073 POITIERS Cedex 9, France.

11 <sup>2</sup> Université Lyon 1, Laboratoire de Biométrie et Biologie Evolutive UMR CNRS 5558, 43  
12 Boulevard du 11 novembre 1918, 69622 Villeurbanne cedex, France.

13 <sup>3</sup> Université de Bourgogne, Laboratoire Biogéosciences, UMR CNRS 6282, 6 Boulevard Gabriel,  
14 21000 Dijon, France.

15 <sup>4</sup> Univ Lyon, Université Claude Bernard Lyon 1, CNRS, ENTPE, UMR 5023 LEHNA, F-69622,  
16 Villeurbanne, France

17 Corresponding author: [sophie.beltran.bech@univ-poitiers.fr](mailto:sophie.beltran.bech@univ-poitiers.fr)

18

19 **Abstract**

20 We tested independently the influences of increasing temperature and decreasing moisture  
21 on life history and physiological traits in the arthropod *Armadillidium vulgare*. Both increasing  
22 temperature and decreasing moisture led reproductive success to decrease. While the density  
23 of immune cells decreased and the  $\beta$ -galactosidase activity increased with increasing  
24 temperature and decreasing moisture, which suggests a negative impact of these stressors on  
25 individual performance, increased temperature and decreased moisture affected differently  
26 the other biomarkers conjuring different underlying mechanisms depending on the stress  
27 applied. Our findings demonstrate overall a negative impact of high temperature and low  
28 moisture on woodlouse welfare. Changing temperature or moisture had slightly different  
29 effects, illustrating the need to test further the respective role of each of these key  
30 components of climate change on organisms to predict more reliably the future of our  
31 ecosystems.

32 **Key words**

33 Abiotic stresses, life history traits, physiological traits, arthropods, climate change

34

35

36 **Conflict of interest disclosure**

37 The authors declare they have no conflict of interest relating to the content of this article.

## 38 Introduction

39 The Intergovernmental Panel on Climate Change (IPCC) forecasts an average increase in  
40 temperature between +1.5°C and +4°C in 2100 (Masson-Delmotte et al., 2021). Not only will  
41 average temperatures and the frequency and intensity of precipitation change, but extreme  
42 events will increase in frequency. Although the link between global warming and drought is  
43 still highly debated and may not be direct (Trenberth et al., 2014), droughts due to a decrease  
44 in rainfall and an increase in evaporation are expected to take place in the coming decades  
45 (Dai, 2013), and should be much more intense than current droughts (Trenberth et al., 2014).  
46 As deterioration of environmental conditions are known to impact life history traits such as  
47 growth rate, reproductive success, or longevity (e.g. Chen et al., 2019; Johnson and Jones,  
48 2016; Khadioli et al., 2014), identifying the potential implications of climate change for  
49 organisms is a research question of paramount importance.

50 Terrestrial arthropods are ectotherms that are particularly sensitive to temperature and  
51 moisture changes (Lister and Garcia, 2018; Maron et al., 2015). Global warming constitutes a  
52 threat for them (Johnson and Jones, 2016). In Lepidoptera, for example, too high  
53 temperatures prevent hatching (Khadioli et al., 2014). In both Lepidoptera and Hymenoptera,  
54 increasing temperature beyond the optimum can have detrimental effect on survival (Abou-  
55 Shaara et al., 2012; Khadioli et al., 2014). In some Coleoptera, egg viability decreases and  
56 hatching time increases for viable eggs when they are exposed to drought (Johnson et al.,  
57 2010). When facing the costs of increased temperature and drought frequency on life history  
58 traits, arthropods display different responses to resist or tolerate such changes (Strachan et  
59 al., 2015). For example, some arthropods can migrate to refugia, others can implement  
60 physiological resistance tactics (e.g. resistant eggs) and/or dormancy, and others are able to  
61 alter their life cycle and/or development (Strachan et al., 2015; Verberk et al., 2008). In  
62 organisms with limited movement capacity, increased temperature and decreased moisture  
63 are expected to induce pronounced physiological stresses. Studying how these stresses affect  
64 both life history and physiological traits would allow us to anticipate the effect of global  
65 warming on organisms with limited movement capacity.

66 The common woodlouse *Armadillidium vulgare* is a key soil decomposer naturally exposed to  
67 a wide range of environmental conditions (Souty-Grosset et al., 1988) that provides major  
68 ecosystem services (David and Handa, 2010), notably in agrosystems and grassland habitats

69 where it is used as an ecological indicator. In the course of its evolutionary history, the  
70 common woodlouse had to adapt to terrestrial life. Consequently, it is still very sensitive to  
71 moisture and temperature variations, which can induce water loss (Smigel and Gibbs, 2008)  
72 and have major consequences in terms of distribution, behavior and survival (Hassall et al.,  
73 2018; Paris and Pitelka, 1962). Moreover, their movement capacity is low (i.e. several hundred  
74 meters during the entire lifetime at the best, Durand et al., 2019) to allow them to migrate so  
75 to avoid the stress imposed by the environment. Our knowledge and ability to measure  
76 woodlouse life history traits and the availability of molecular and cellular biomarkers of  
77 individual quality (Depeux et al., 2020a) make this species a highly relevant experimental  
78 model to study the influence of both temperature and moisture on life history and  
79 physiological traits.

80 In this study, we tested independently the effects of increased temperature (experiment 1)  
81 and of decreased moisture (experiment 2) on a selected set of key life history (i.e. growth,  
82 reproductive success, and survival) and physiological (i.e. immune cell parameters (cell  
83 viability, cell density and cell size) and  $\beta$ -galactosidase activity) traits in woodlouse. In  
84 experiment 1 (i.e. testing the effect of increased temperature), we compared individuals  
85 maintained at 20°C and 80% of moisture (i.e. the standard temperature and moisture  
86 laboratory conditions) to individuals exposed at 28°C (simulating a temperature increase of  
87 8°C) still at 80% of moisture. In experiment 2 (i.e. testing the effect of decreased moisture),  
88 we compared animals in standard conditions to individuals exposed at 50% of moisture  
89 (simulating a moisture loss of 30%) still at 20°C. We hypothesized that a rise in temperature  
90 and a loss in moisture should be stressful and should induce changes in life history and  
91 physiological traits.

## 92 **MATERIALS & METHODS**

### 93 ***Biological Material – Routine Breeding***

94 All specimens of *A. vulgare* used in this study descend from individuals sampled in Denmark  
95 (Helsingör) in 1982. Since then, animals were reared under laboratory conditions under the  
96 natural photoperiod of Poitiers (France) (46°35'N; 0°20'E), at 20°C and about 80-85% of  
97 moisture, in plastic boxes (length × width × height: 26.5 × 13.5 × 7.5 cm) containing humid  
98 loam, and fed ad libitum with carrot slices and dried linden leaves. Controlled breeding, for

99 the maintenance of the lineage over years, is performed in individual boxes (diameter x height:  
100 9,8cm x 4,9cm), with reproductive pairs selected from their pedigree to avoid inbreeding. One  
101 month after mating, offspring exit the female *marsupium* (i.e. female ventral pouch on which  
102 the eggs develop) (Suzuki and Ziegler, 2005). We transferred these offspring a few days after  
103 birth into a bigger box (length x width x height: 26.5 x 13.5 x 7.5 cm) with loam and food. After  
104 3 months, once sexual characters have appeared but before sexual maturity, we placed young  
105 males and females in separate boxes (length x width x height: 26.5 x 13.5 x 7.5 cm) in  
106 laboratory conditions described above, enabling us to obtain virgin adults. For the  
107 maintenance of the lineage, about 40 crosses have been performed following this protocol  
108 each year. Each of the 40 broods provides at least one breeder for the next generation. The  
109 animals used in the experiments of this study came from this controlled lineage.

## 110 ***Experimental Design***

### 111 **Experiment 1: effect of increased temperature on life history and physiological traits**

112 The experiment 1 performed in January 2019 involved the comparison between two groups  
113 of animals aged of 7 months old maintained at different temperatures in two climatic  
114 chambers (Memmert HPP 256L with LED Light module cold white 6500K for HPP260 (15%) and  
115 Interior IP68 socket (for temperature restriction)) during two months after standard  
116 conditions of maintenance:

- 117 (i) The “Control Temperature” group (CT) of animals maintained in standard  
118 conditions (i.e. at 20°C and 80% of moisture) in one of our two climatic chambers.
- 119 (ii) The “High Temperature” (HT) group of animals exposed at 28°C (simulating  
120 increased temperature by 8°C (i.e. thermal stress condition)) and at 80% of  
121 moisture in the second climatic chamber.

122 Eight degrees (i.e. difference in temperature between the two groups) corresponds to a  
123 temperature increase close to daily variations observed in Poitiers during some summers,  
124 which could chronically induce stress. Moreover, we have observed the stressful effect of this  
125 temperature increase in a preliminary experiment in which we did not control the moisture  
126 variation (Depeux et al., 2019).

127 In each group, animals were fed *ad libitum* in 3 boxes (length × width × height: 26.5 × 13.5 ×  
128 7.5 cm; standard laboratory density conditions) of 30 females and 3 boxes of 30 males from  
129 15 different clutches (i.e. all treatments included animals with the same genetic background  
130 (i.e. issued from 15 same clutches) to be comparable). For each condition, one box was used  
131 to monitor survival and growth (mass gain over time) of animals from the beginning to the  
132 end of the experiment, another was used to evaluate reproductive success and the last box  
133 served to quantify physiological traits (i.e. immune cell parameters: cell viability, cell density,  
134 and cell size) and  $\beta$ -galactosidase activity, see below). In this last box, the animals had to be  
135 sacrificed (see ‘Ethical statement’ section below) because of the protein extraction on nerve  
136 chains that was required to measure the  $\beta$ -galactosidase activity.

### 137 **Experiment 2: effect of moisture loss on life history and physiological traits**

138 The experiment 2 performed in January 2021 involved the comparison between two groups  
139 of 7 months old animals maintained under different conditions in our two climatic chambers  
140 during two months after standard conditions of maintenance:

- 141 (i) The “Control Moisture” (CM) group of animals maintained in standard conditions  
142 (i.e. at 20°C and 80% of moisture) in one of our two climatic chambers
- 143 (ii) The “Loss of Moisture” (LM) group of animals exposed at 50% of moisture  
144 (simulating a moisture loss of 30% (i.e. water stress condition)) and at 20°C in the  
145 second climatic chamber.

146 Similar to the experiment 1, in each group, animals were fed *ad libitum* in 3 boxes of 30  
147 females and 3 boxes (length × width × height: 26.5 × 13.5 × 7.5 cm; standard laboratory density  
148 conditions) of 30 males from 15 different clutches (i.e. all boxes to compare included animals  
149 with the same genetic background (i.e. issued from 15 same clutches)). For each condition,  
150 one box was used to monitor individual survival and growth from the beginning to the end of  
151 the experiment, another was used to evaluate reproductive success and the last box served  
152 to quantify physiological traits (see below).

153 In our two experiments, we aimed to compare individuals of the same age because age  
154 negatively impacts both reproductive success (Depeux et al., 2020b) and physiological traits  
155 (Depeux et al., 2020a). Having initially only two climatic chambers, we had to perform our  
156 experiments 1 and 2 in different years (i.e. experiment 1 in 2019 and experiment 2 in 2021).

157 Thus, we systematically compared the effect of each stress against its own control condition  
158 group (i.e. CT for HT and CM for LM). Moreover, at the beginning of each experiment (1 and  
159 2), we selected individuals of the same size and we checked, at the end of the experiments,  
160 potential statistical differences between the two control groups (CT and CM) on measures of  
161 life history and physiological traits (Supp. File1).

## 162 **Ethical statement**

163 The Decree n°2003-768 from 01/08/2003 and the European Directive 2010/63/EU regulating  
164 animal research does not require any ethical evaluation prior to research on arthropods.  
165 However, we complied with the ethical 3R rules (Replace/Reduce/Refine). Even though it was  
166 impossible to replace the use of animals in our study, we reduced the number of used animals,  
167 optimizing this number to a minimum to ensure a reliable assessment of the effect of the  
168 different stressors on life history and physiological traits. Although individuals were obviously  
169 stressed during the experiments, we made sure that they were provided with optimal living  
170 conditions throughout the experiments. In addition, when the tissue sampling required the  
171 death of individuals (i.e. to measure physiological traits such as  $\beta$ -galactosidase activity), the  
172 animals to be euthanized were frozen before protein extractions to take into account animal  
173 welfare as much as possible.

## 174 ***Life history traits***

### 175 **Survival and growth**

176 One box of males and one box of females from each group (i.e. for the groups CT, HT, CM, LM)  
177 were used to monitor and compare changes of survival and body mass over time. All  
178 individuals in these boxes were monitored for 124 days (i.e. about 4 months). We sampled  
179 individuals at 14, 28, 42, 69, and 124 days (i.e. 5 sampling points per box) and assessed  
180 survivorship and change in body mass (in grams) of all surviving animals in each box (body  
181 mass was measured with a precision balance 650g|1mg Sartorius™ BCE653-1S Entris™ II  
182 Essential). Then, we compared these traits over time and between groups (CT vs. HT groups  
183 and CM vs. LM groups) to test independently the effect of temperature and moisture changes  
184 on these traits (see section on Statistical analyses). Due to regular moults, individual  
185 identification among the 30 animals sharing in given box cannot be performed, leading our  
186 measures to be average survival and growth instead of individual trajectories.

187 **Reproductive success**

188 At the end of the exposure to different conditions, one box of males and one box of females  
189 were collected from each group (i.e. for the groups CT, HT, CM, and LM). We formed 20  
190 breeding pairs composed of one male and one female per group. Each breeding pair was  
191 placed in a box, at 20°C, with food provided *ad libitum* and in a photoperiod of 16:8 (L/D)  
192 stimulating the reproduction (Mocquard et al., 1989). We followed all these pairs for 5 months  
193 during which each clutch produced was recorded. At the end of this period, the ability to  
194 produce a clutch (i.e. the probability that one clutch or more is produced by a given pair) for  
195 the 80 pairs (i.e. 40 pairs for experiment 1 and 40 pairs for experiment 2) was compared  
196 independently between CT and HT groups and between CM and LM groups to test the effect  
197 of temperature and moisture changes on breeding success. As we created groups from similar  
198 clutches to have the same genetic background among boxes, we cannot exclude that some  
199 crosses were composed of related individuals although we expect this event to be rare.  
200 However, the probability of forming sibling pairs (8%) was similar among groups that were  
201 exposed either at 20°C vs. 28°C or at 80% vs. 50% of moisture.

202 **Physiological traits**

203 At the end of the experimental treatments (i.e. after two months in our experimental  
204 conditions), one box of males and one box of females were taken from each group (i.e. for the  
205 groups CT, HT, CM, and LM) for measuring the level of our set of physiological traits (i.e.  
206 immune cells parameters and  $\beta$ -galactosidase activity) developed in Depeux et al. (2020a).  
207 These physiological traits were firstly described as senescence biomarkers because they allow  
208 predicting the amount of cellular senescence in different organisms and are strongly age-  
209 dependent in *A. vulgare* (i.e. older the individual, higher the decline of these biomarkers,  
210 Depeux et al. 2020a). We performed these measures on each remaining animals (Table 1) and  
211 we compared these metrics independently between CT and HT groups for experiment 1 and  
212 between CM and LM groups for experiment 2 (see section Statistical analyses).

213 Table 1. Numbers of individuals on which we measured quality biomarkers.

| Groups             | CT (Control temperature) | HT (High temperature) | CM (Control Moisture) | LM (Loss of Moisture) |
|--------------------|--------------------------|-----------------------|-----------------------|-----------------------|
| Numbers of females | 13                       | 12                    | 9                     | 15                    |
| Numbers of males   | 17                       | 17                    | 15                    | 15                    |



214

## 215 **Immune cells**

216 As immune cells are free-circulating, they can inform about a potential premature biological  
217 aging. When an individual *A. vulgare* ages, its immune cells decrease in density and viability  
218 while increasing in size (Depeux et al., 2020a). To measure these parameters, we collected 3 $\mu$ L  
219 of haemolymph per individual and placed it in 15 $\mu$ L of MAS-EDTA (EDTA 9 mM, Trisodium  
220 citrate 27 mM, NaCl 336 mM, Glucose 115 mM, pH 7, (Rodriguez et al., 1995)). We then added  
221 6 $\mu$ L of Trypan Blue at 0.4% (Invitrogen) to discriminate live and dead cells. After, 10 $\mu$ L of this  
222 solution was put in Invitrogen Countess<sup>®</sup> counting slide and put in an automated Cell Counter  
223 (Invitrogen) to quantify cell density (measured as the number of cells per mL of haemolymph),  
224 viability (measured as the proportion of live cells) as well as cell size (in  $\mu$ m). These three  
225 parameters of the immune cells are physiological traits that were found to be reliable  
226 biomarkers of cellular senescence in *A. vulgare* (Depeux et al., 2020a).

## 227 **$\beta$ -galactosidase activity**

228 The  $\beta$ -galactosidase activity is a physiological trait commonly used as a marker of cellular  
229 senescence (Lee et al., 2006). Its indirect activity in regards to the process of cellular  
230 senescence increases with age in *A. vulgare* (Depeux et al., 2020a). To measure this enzymatic  
231 activity, we dissected and removed the nerve cord of each individual after having collected  
232 haemolymph for assessing the immune parameters. We put individual nerve cords in 300 $\mu$ L  
233 of Lyse Buffer 1X (CHAPS 5 mM, Citric acid 40 mM, Sodium Phosphate 40 mM, Benzamidine  
234 0.5 mM, PMSF 0.25 mM, pH = 6) (Gary and Kindell, 2005). We centrifuged the sample at 15  
235 000g for 30 minutes at 4°C and then we collected and kept the supernatant at -80°C. We  
236 quantified the protein concentration thanks to the BCA Assay and we homogenized all  
237 samples at the 0.1mg/mL protein concentration. Then, 100 $\mu$ L of these protein extracts were  
238 added to 100 $\mu$ L of reactive 4-methylumbelliferyl-D-galactopyranoside (MUG) solution. The  
239 synthesis of the fluorescent 4-methylumbelliferone (4-MU), the result of the contact of MUG  
240 reactive with  $\beta$ -galactosidase, was measured using the multimode microplate reader Mithras  
241 LB940 133 HTS III, Berthold; excitation filter: 120 nm, emission filter 460 nm, for 120 minutes.  
242 We included two technical replicates for each sample to obtain the measures.

## 243 **Statistical analyses**

244 All statistical analyses were performed using the software R 4.2.1 (R core Team 2022).  
245 The effects of the stress condition (control vs. high temperature, or control vs. low moisture)  
246 on life history and physiological traits were tested using the following models. (i) Life history  
247 traits. For the survival data, Cox proportional hazard models were fitted with stress condition,  
248 sex and their interaction term as fixed variables, using the ‘survival’ package (Therneau, 2022).  
249 For the growth data, the body mass was modelled using linear models with Gaussian  
250 distribution with stress condition, sex, time (i.e. time after placing in climatic chamber, in days)  
251 and their two-by-two interaction term as fixed variables. The female reproductive success was  
252 modelled as binary data (*presence of at least one clutch or absence of clutch*) using linear  
253 regression with a binomial distribution, with stress condition as fixed variables. (ii)  
254 Physiological traits. The cell density, cell size, cell viability, and the  $\beta$ -galactosidase activity  
255 were modelled using linear models with Gaussian distribution with stress condition, sex, and  
256 their interaction term as fixed variables.

257 We proceeded to model selection starting with full (saturated) model. We ranked all nested  
258 models according to their AICc using ‘MuMIn’ package (Barton, 2022). We selected the most  
259 parsimonious models among the top ranked models ( $\Delta\text{AICc} < 2$ ) (Galipaud et al., 2017). The  
260 tables summarizing the model selection procedure was presented in Supp. File2. To represent  
261 the effect of the two environmental stresses in each variable, we presented our results with  
262 indices of size effect. The effect of each stress on each measure of life history traits and  
263 biomarkers of individual quality were measured using the standardized slopes (Schielzeth et  
264 al 2010) and their SE calculated by rescaling the variable of the selected model. For survival  
265 data, the effect size was the hazard ratio, calculated as the exponential of the regression  
266 parameter (Collett 2003). When the selected model did not include the effect of the stress,  
267 we took the model with the variable stress as fixed factor to obtain a size effect as done in  
268 Depeux et al. 2020a.

### 269 ***Data, script and code availability***

270 All datasets and source code are available as electronic supplementary materials on public  
271 repository: <https://doi.org/10.5281/zenodo.7496837>

## 272 RESULTS

273 As said previously, we checked, at the end of the experiments, potential statistical differences  
274 between the two control groups (CT and CM) on measures of life history and physiological  
275 traits (Supp. File1). Although  $\beta$ -galactosidase activity and cell density were higher in the CT  
276 group than in the CM group (Supp. File1), we observed the same dynamics in these measures  
277 in the face of their stressful condition (HT and LM, respectively) (see Results part). The body  
278 mass at day 14 was higher in the CM group than in the CT group (Supp. File1). Whatever the  
279 differences observed between the two control groups (CT group used in 2019 and CM group  
280 used in 2021), we compared the effect of each stress (HT in 2019 and LM in 2021, respectively)  
281 against its own control group (CT group in 2019 and CM group in 2021, respectively) for testing  
282 the effect of each stress.

### 283 *Life history traits*

284 Survival was not impacted by an increased temperature ( $\chi^2_1=2.16$ ,  $P=0.14$ , Fig.1A, Supp. File2  
285 Table S2a, Supp. File3-1.A.1) although mortality risk was almost twice as lower at low  
286 compared to high temperature. The hazard ratio was 1.78, with a 95%CI including 1 [0.81;  
287 3.88]. By contrast, individuals exposed to a water stress had a 2.5 times higher mortality risk  
288 ( $\chi^2_1=4.54$ ,  $P=0.03$ , Fig. 1B, Supp. File2 Table S2b, Supp. File3-1.A.2). The hazard ratio was 2.69,  
289 with a 95%CI excluding 1 [1.03; 7.01]. As a result, 90% of individuals placed at control moisture  
290 were still alive at the end of the follow-up, whereas only 75% of individuals placed in water  
291 stress condition survived at the end of the experiment.

292 In both thermal and water stresses, body mass increased during the entire experiment  
293 duration (Fig. 1C and 1D, Supp. File3-1.B.1 and 1.B.2), as expected in an indeterminate grower  
294 as *A. vulgare*, but there was no detectable interaction between day and sex (Supp. File2 Table  
295 S2c and Table S2d). For the temperature experiment, interactions between sex and stress  
296 ( $F_{1,528}=6.90$ ,  $P=0.0088$ , Supp. File3), and between day and thermal stress ( $F_{1,528}=14.6$ ,  
297  $P=0.00015$ , Supp. File2 Table S2c) showed up, illustrating the impact of an increasing  
298 temperature on growth. By contrast, in the moisture experiment, the body mass was not  
299 affected by the sex ( $F_{1,522}=0.35$ ,  $P=0.55$ ), the water stress ( $F_{1,522}=0.31$ ,  $P=0.58$ ), or any  
300 interaction between the variables (all  $P > 0.10$ ).

301 The reproductive success markedly decreased in both experiments for the stressful condition:  
302 a fourfold increase of reproductive failure in presence of thermal stress ( $\chi^2_1=5.02$ ,  $p=0.025$ ,  
303 Odd-ratio=0.23, 95%CI=[0.057;0.83], Fig. 1E, Supp. File2 Table S2e, Supp. File3-1.C.1), and a  
304 fivefold increase of reproductive failure in presence of water stress ( $\chi^2_1=5.38$ ,  $p=0.02$ , Odd-  
305 ratio=0.20, 95%CI=[0.045;0.79], Fig. 1F, Supp. File2 Table S2f, Supp. File 3-1.C.2). In both cases,  
306 it corresponds to halving the reproductive success in the stress groups (water stress: 55% in  
307 the control group vs. 20% in the stressed group; thermal stress: 65% in the control group vs.  
308 30% in the stressed group).

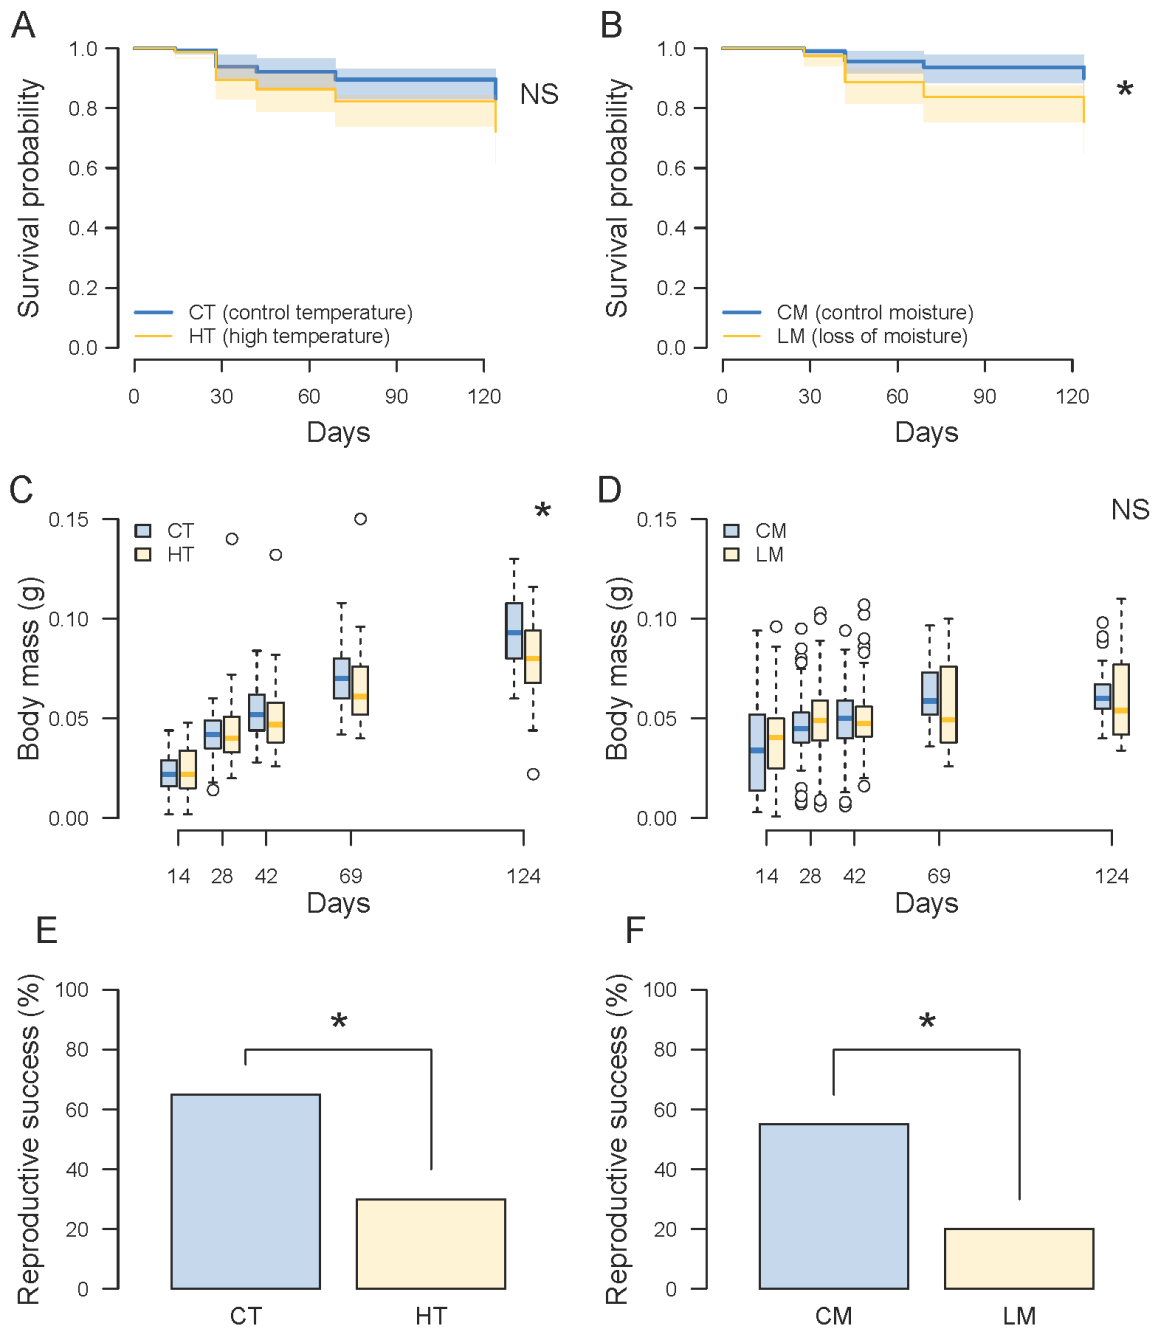

309

310 **Figure 1. Effect of the two environmental stressors (Temperature (A, C and E) and Moisture (B, D and F) on**  
 311 **Survival (A and B), Body mass (C and D) and Reproductive success (E and F).** Blue colour: control groups, orange  
 312 colour: stress groups. CT: Control Temperature (20°C), HT: High Temperature (28°C), CM: Control Moisture (80%), LM: Loss of  
 313 Moisture (50%). NS: No significant; \*  $p < 0.05$ .

### 314 **Physiological traits**

#### 315 *Immune cells*

316 Immune cell viability was not affected by the thermal stress ( $F_{1,56}=0.92$ ,  $p=0.34$ , standardized  
 317 slope  $\beta=-0.25$ ; 95%CI=[-0.79;0.27], Fig. 2A, Supp. File2 Table S2g and Supp. File3-2.A.1) but

318 decreased during the water stress ( $F_{1,50}=4.17$ ,  $p=0.046$ , standardized slope  $\beta=0.55$ ;  
319  $95\%CI=[0.01;1.09]$ , Fig. 2B, Supp. File2 Table S2h and Supp. File3-2.A.2).

320 Immune cell size decreased during the thermal stress ( $F_{1,55}=5.72$ ,  $p=0.02$ , standardized slope  
321  $\beta=-0.60$ ;  $95\%CI=[-0.1;-1.1]$ , Fig. 2C, Supp. File2 Table S2i and Supp. File 3-2.B.1) but not under  
322 the water stress ( $F_{1,50}=3.79$ ,  $p=0.057$ , standardized slope  $\beta=-0.55$ ;  $95\%CI=[-1.07;0.02]$ , Fig. 2D,  
323 Supp. File2 Table S2j and Supp. File3-2.B.2).

324 Immune cell density decreased during the thermal stress ( $F_{1,56}=38.2$ ,  $P<0.001$ , standardized  
325 slope  $\beta=-1.26$ ;  $95\%CI=[-1.67;-0.85]$ , Fig. 2E, Supp. File2 Table S2k and Supp. File3-2.C.1)) and  
326 the water stress ( $F_{1,50}=7.64$ ,  $p=0.008$ , standardized slope  $\beta=0.72$ ;  $95\%CI=[0.19;1.25]$ , Fig. 2F,  
327 Supp. File2 Table S2l and Supp. File3-2.C.2).

### 328 *$\beta$ -galactosidase activity*

329 The  $\beta$ -galactosidase activity increased with the thermal stress ( $F_{1,54}=11.32$ ,  $P=0.0014$ ,  
330 standardized slope  $\beta=0.82$ ;  $95\%CI=[0.33;1.32]$ , Fig.2G, Supp. File2 Table S2m, and Supp. File3-  
331 2.D.1), but also with the water stress ( $F_{1,50}=10.50$ ,  $P=0.002$ , standardized slope  $\beta=-0.83$ ;  
332  $95\%CI=[-1.31;-0.32]$ , Fig. 2H, Supp. File2 Table S2n and Supp. File3-2.D.2).

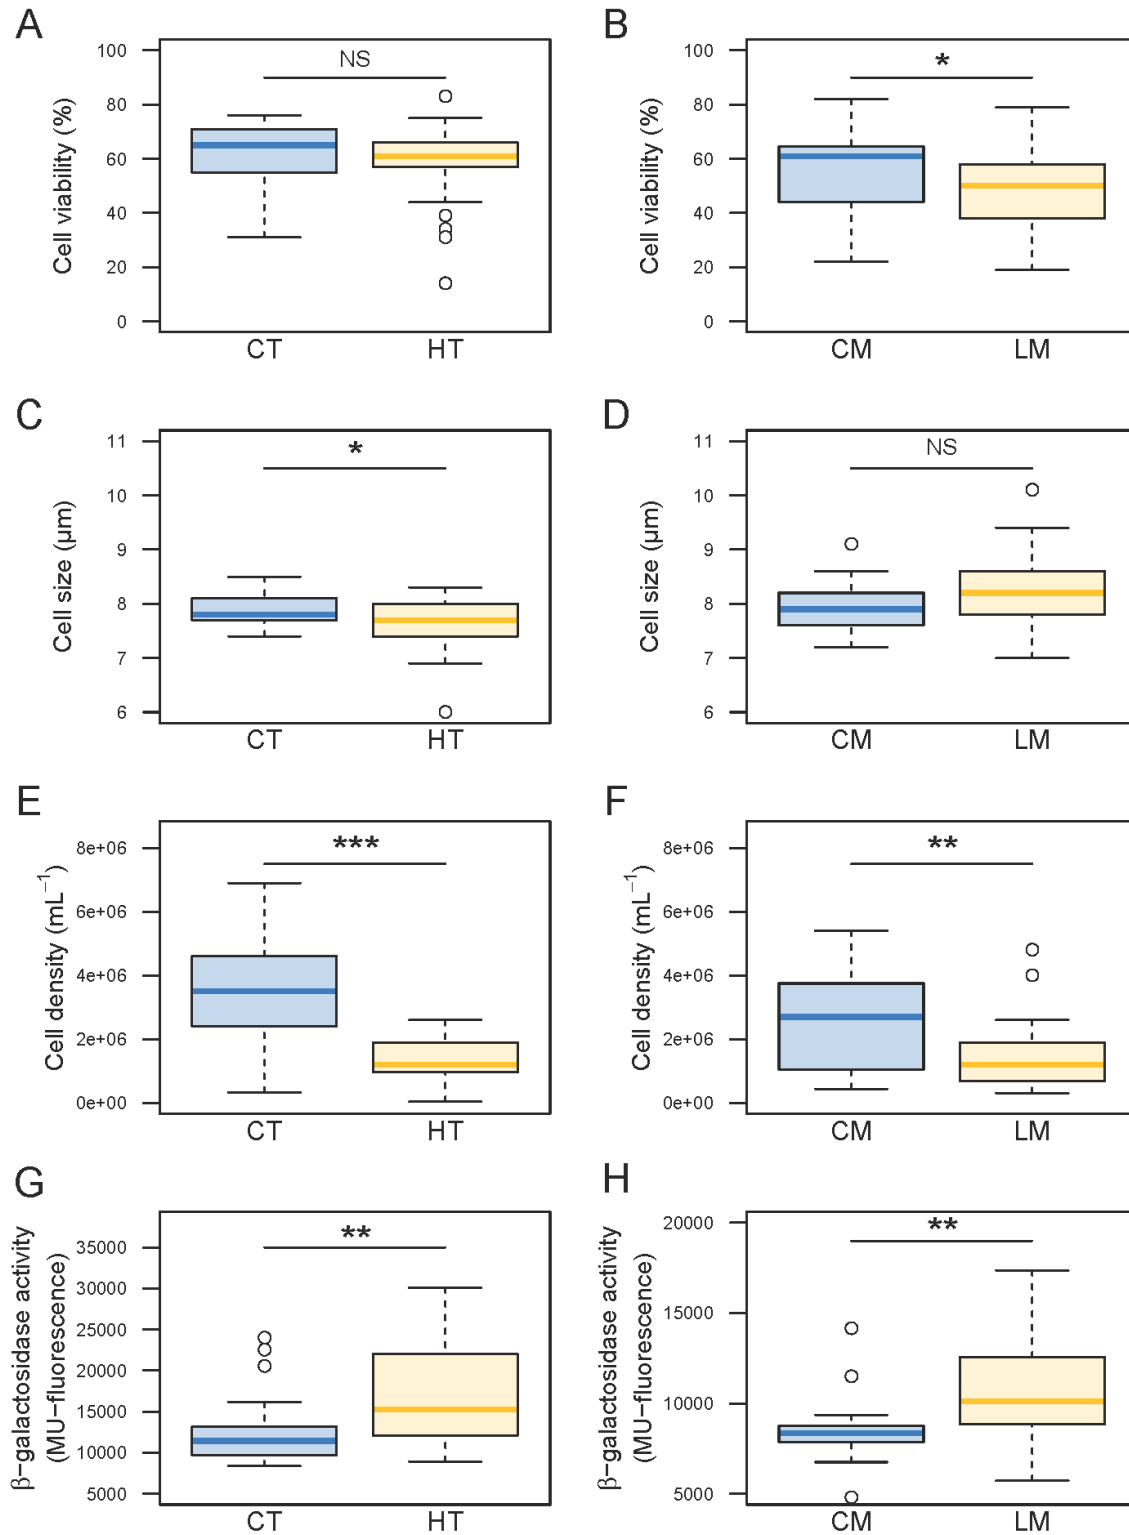

333

334 **Figure 2. Effect of the two environmental stressors (Temperature (A, C, E, and G) and Moisture (B, D, F and H)**  
335 **on immune cell viability (A and B), immune cell size (C and D), immune cell density (E and F) and  $\beta$ -galactosidase**  
336 **activity (G and H). Blue colour: control groups, orange colour: stress groups. CT: Control Temperature (20°C), HT: High**  
337 **Temperature (28°C), CM: Control Moisture (80%), LM: Loss of Moisture (50%). NS: No significant; \*  $p < 0.05$ , \*\*  $p < 0.01$ , \*\*\***  
338  **$p < 0.001$ .**

## 339 DISCUSSION

340 Our results highlight that life history traits were negatively impacted by the two environmental  
341 stressors (thermal and water stresses) considered in this study. Moreover, the detrimental  
342 effects of these stressors on our set of biomarkers of individual quality are consistent with an  
343 overall premature ageing of stressed animals compared to unstressed ones. To briefly  
344 summarize, an increase in temperature (thermal stress) negatively affects both the body mass  
345 trajectory over time and the reproductive success of individuals. A decrease in moisture (water  
346 stress) resulted in a decrease of both survival and reproductive success. Concerning our  
347 physiological traits: (1) the density of immune cells decreases under both stresses, (2) immune  
348 cell size decreases under thermal stress, but is not impacted under water stress, (3) the  
349 viability of the cells decreases under water stress (but not under thermal stress) and (4) finally,  
350 the  $\beta$ -galactosidase activity increases for the two stressed groups. In this context, our results  
351 globally support marked negative effects of thermal and water stresses on woodlouse  
352 performance, with some minor differences between the two stressors in their effects on life  
353 history and physiological traits.

354 About the life history traits, if the thermal stress has no detectable effect on survival in *A.*  
355 *vulgare*, contrary to what has been previously reported in arthropods studied so far such as  
356 *Antestiopsis thunbergii*, *Calliphora stygia* and *Margaritifera margaritifera* (Azrag et al., 2017;  
357 Hassall et al., 2017; Kelly et al., 2013), this stressor leads to a slowdown in woodlouse growth,  
358 in line to what has been reported in three other isopods (Angilletta et al., 2004). In parallel,  
359 the water stress leads to a decrease in reproductive success, as previously reported in females  
360 of *Antestiopsis thunbergii* (Azrag et al., 2017). In *A. vulgare*, individual body size is positively  
361 correlated with fecundity (Durand et al., 2018; Lawlor, 1976), meaning that the slowdown in  
362 growth could explain, at least partly, the decrease in reproductive success for stressed animals  
363 compared to non-stressed ones. Concerning the water stress, if the loss of moisture has no  
364 detectable effect on woodlouse growth, it causes a decrease in both survival and reproductive  
365 success. These findings suggest a high cost of drought on individual fitness in *A. vulgare*.

366 About the physiological traits, our results of the thermal stress experiment show that although  
367 cell density is negatively impacted by increased temperature, cell viability is not affected.  
368 Moreover, contrary to the expectation when individuals are senescent, cell size decreases  
369 instead of increasing. This last result supports our previous finding that cells decrease in size



370 when the temperature raises (without controlling moisture level, Depeux et al., 2019). That  
371 smaller cells are associated with increased cell renewal in stressed animals might explain this  
372 pattern. On the other hand, the increase of  $\beta$ -galactosidase activity seems to indicate  
373 premature ageing (and thus a decrease in quality) in individuals exposed to thermal stress.  
374 Concerning the water stress, the biomarkers of individual quality indicate a decrease in cell  
375 density and viability, associated with an increase in  $\beta$ -galactosidase activity, which suggests an  
376 acceleration of biological ageing in the individuals exposed to a water stress (Depeux et al.,  
377 2020a).

378 We reported a global negative effect of the thermal stress in *A. vulgare* in our study, but our  
379 results seem to show an even higher and clearer effect of the water stress on both life history  
380 traits and biomarkers of individual quality. Although the woodlouse has become terrestrial for  
381 a long time, the individuals of that species are still dependent on and require a substantial  
382 water supply (Smigel and Gibbs, 2008). Thus, behaviours like aggregation that allow  
383 individuals to resist to desiccation have been set up and thereby to maintain the rate of  
384 moisture required for survival (Broly et al., 2013; Smigel and Gibbs, 2008). This can explain the  
385 strong effect of water stress in our study. Under natural conditions, increase in temperature  
386 and loss of moisture generally positively covary, leading to even higher negative consequences  
387 on the woodlouse performance. Further work will be required to test the influence of more  
388 extreme and maybe more realistic conditions by simultaneously increasing temperature and  
389 decreasing moisture on life history and physiological traits. A study in the wild comparing life  
390 history and physiological traits on *A. vulgare* collected across areas with different temperature  
391 and drought gradient would also allow a better assessment of the combined effects of these  
392 stressors.

393 Unlike what happens in nature, our experimental study on a laboratory line of woodlouse allowed us  
394 to test the effect of the thermal and water stresses while controlling for potentially confounding  
395 factors such as individual age. Indeed, it is highly challenging to control for individual age in the wild.  
396 In this context, the use of our controlled laboratory line on which we developed our physiological  
397 markers allowed us to account for the exact age of the animals (which is itself linked to life history and  
398 physiological traits (Depeux et al., 2020b)) and for their genetic origin. We compared groups of the  
399 same origin (and our controlled crosses guarantee the genetic diversity of our line) and of the same  
400 age. This allows us to limit confounding effects as much as possible and to quantify the effects of the  
401 two tested stressors independently.

402 Thanks to our experimental design that allowed us to test independently the influence of  
403 stressors that organisms are likely to face in the wild, we showed that thermal and water stress  
404 do not have the same impact. Although simulations based on mathematical models have  
405 predicted that both temperature and drought changes overall affect arthropods, experimental  
406 approaches such as reported in this work are required to quantify reliably the influence of  
407 changing conditions on life history and physiological traits (Johnson et al. 2010). Drought can  
408 have serious physiological consequences on invertebrates, involving e.g. protein denaturation  
409 and undesirable macromolecular interactions (Sano et al., 1999; Tang and Pikal, 2005) or  
410 oxidative damage (Lopez-Martinez et al., 2008), which are known to be associated with  
411 cellular senescence (Gilca et al., 2007) and thus in the decreased performance observed in  
412 stressed organisms. Due to the role of arthropods in services to many ecosystems (e.g.  
413 biochemical balance of ecosystems, agriculture, pest management...), and in the context of  
414 global warming, it is crucial to understand the effects of temperature and moisture changes  
415 on these organisms (Santos et al., 2021). As temperature increase is not the only  
416 environmental change expected to take place in the coming years, it is of paramount  
417 importance to assess also the impact of other stressors. Although many predictive models  
418 have been proposed so far, getting more accurate information on the expected responses of  
419 organisms facing with different kinds of stress would provide the required information to test  
420 these model predictions.

421 To conclude, *A. vulgare* is an important actor that delivers ecosystem services in many  
422 ecosystems because it actively impacts soil fertility (Souty-Grosset and Faberi, 2018) and it is  
423 also used as an ecological indicator of grassland habitats (Paoletti and Hassall, 1999; Souty-  
424 Grosset et al., 2005). This detritivorous species facilitates decomposition processes and  
425 nutrient cycling on which agricultural productivity and sustainability depend (Bredon et al.,  
426 2018; Paoletti and Hassall, 1999), and plays thereby a key role in ecosystem services (David  
427 and Handa, 2010). Extending knowledge in the response of soil biodiversity facing current  
428 global changes could promote sustainability by helping to the development of new tools and  
429 strategies for more efficient management of soils and associated crops, through more  
430 effective and targeted recolonisation and/or restoration of soil biodiversity. Also, to better  
431 understand what the future of the animal communities in the current context of global

432 warming will be, it is necessary to perform studies on models presenting particular ecological  
433 requirements, such as woodlouse.

#### 434 **Supplementary files**

435 All supplementary files are available on public repository:

436 <https://www.biorxiv.org/content/10.1101/2022.09.26.509512v1.supplementary-material>

437 Supp. File1 Comparison of the two control groups

438 Supp. File2 Model selection

439 Supp. File3 Graphical representations of results per sex

#### 440 **FUNDING**

441 This work was supported by the French ministry of Education, the 2015–2020 State-Region  
442 Planning contract, European Regional Development Fund (FEDER), the French Biodiversity  
443 Agency (OFB-22-1124) and intramural funds from the Centre National de la Recherche  
444 Scientifique and the University of Poitiers, and by a grant from the Agence Nationale de la  
445 Recherche (ANR-15-CE32-0002-01).

#### 446 **ACKNOWLEDGMENTS**

447 We would like to thank Alexandra Lafitte for technical assistance, and two anonymous  
448 reviewers and the recommender of PCI Ecology for their constructive comments.

#### 449 **BIBLIOGRAPHY**

450 Abou-Shaara, H.F., Al-Ghamdi, A.A., and Mohamed, A.A. (2012). Tolerance of two honey bee  
451 races to various temperature and relative humidity gradients. *Environ. Exp. Biol.* *10*, 133–138.

452 Angilletta, M.J., Jr., Steury, T.D., and Sears, M.W. (2004). Temperature, growth rate, and body  
453 size in ectotherms: fitting pieces of a life-history puzzle. *Integr. Comp. Biol.* *44*, 498–509.

454 Azrag, A.G.A., Murungi, L.K., Tonnang, H.E.Z., Mwenda, D., and Babin, R. (2017). Temperature-  
455 dependent models of development and survival of an insect pest of African tropical highlands,  
456 the coffee antestia bug *Antestiopsis thunbergii* (Hemiptera: Pentatomidae). *J. Therm. Biol.* *70*,  
457 27–36.

458 Bartoń, K. (2022). MuMIn: Multi-Model Inference. R package version 1.46.0, [https://CRAN.R-](https://CRAN.R-project.org/package=MuMIn)  
459 [project.org/package=MuMIn](https://CRAN.R-project.org/package=MuMIn).

460 Bredon, M., Dittmer, J., Noël, C., Moumen, B., and Bouchon, D. (2018). Lignocellulose  
461 degradation at the holobiont level: teamwork in a keystone soil invertebrate. *Microbiome* *6*,  
462 162.

- 463 Broly, P., Deneubourg, J.-L., and Devigne, C. (2013). Benefits of aggregation in woodlice: a  
464 factor in the terrestrialization process? *Insectes Soc.* *60*, 419–435.
- 465 Chen, C., Yang, H., Xue, F., and Xia, Q. (2019). Geographical variation in life-history traits  
466 suggests an environmental-dependent trade-off between juvenile growth rate and adult  
467 lifespan in a moth. *Bull. Entomol. Res.* *109*, 626–632.
- 468 Collett, D. (2003). *Modelling survival data in medical research*. Chapman and Hall, London.
- 469 Dai, A. (2013). Increasing drought under global warming in observations and models. *Nat.*  
470 *Clim. Change* *3*, 52–58.
- 471 David, J.-F., and Handa, I.T. (2010). The ecology of saprophagous macroarthropods (millipedes,  
472 woodlice) in the context of global change. *Biol. Rev.* *85*, 881–895.
- 473 Depeux, C., Samba-Louaka, A., Braquart-Varnier, C., Moreau, J., Lemaître, J.-F., Laverre, T.,  
474 Paulhac, H., Dechaume-Moncharmont, F.-X., Gaillard, J.-M., and Beltran-Bech, S. (2019).  
475 Impact of temperature and photoperiod on survival and biomarkers of senescence in common  
476 woodlouse. *BioRxiv* <https://www.biorxiv.org/content/10.1101/433011v4>.
- 477 Depeux, C., Samba-Louaka, A., Becking, T., Braquart-Varnier, C., Moreau, J., Lemaître, J.-F.,  
478 Laverre, T., Paulhac, H., Dechaume-Moncharmont, F.-X., Gaillard, J.-M., and Beltran-Bech, S.  
479 (2020a). The crustacean *Armadillidium vulgare* (Latreille, 1804) (Isopoda: Oniscoidea), a new  
480 promising model for the study of cellular senescence. *J. Crustac. Biol.* *40*, 194–199.
- 481 Depeux, C., Lemaître, J., Moreau, J., Dechaume-Moncharmont, F., Laverre, T., Paulhac, H.,  
482 Gaillard, J., and Beltran-Bech, S. (2020b). Reproductive senescence and parental effects in an  
483 indeterminate grower. *J. Evol. Biol.* *33*, 1256–1264.
- 484 Durand, S., Loiseau, V., Prigot, C., Braquart-Varnier, C., and Beltran-Bech, S. (2018). Producing  
485 offspring in *Armadillidium vulgare* : Effects of genetic diversity and inbreeding. *Evol. Dev.* *20*,  
486 65–77.
- 487 Durand, S., Grandjean, F., Giraud, I., Cordaux, R., Beltran-Bech, S., and Bech, N. (2019). Fine-  
488 scale population structure analysis in *Armadillidium vulgare* (Isopoda: Oniscoidea) reveals  
489 strong female philopatry. *Acta Oecol.* *101*, 103478.
- 490 Galipaud M, Gillingham MA, and Dechaume-Moncharmont F-X (2017). A farewell to the sum  
491 of Akaike weights: the benefits of alternative metrics for variable importance estimations in  
492 model selection. *Methods in Ecology and Evolution* *8*:1668–1678.
- 493 Gary, R.K., and Kindell, S.M., 2005. Quantitative assay of senescence-associated  $\beta$ -  
494 galactosidase activity in mammalian cell extracts. *Anal. Biochem.* *343*, 329–334.
- 495 Gilca, M., Stoian, I., Atanasiu, V., and Virgolici, B. (2007). The oxidative hypothesis of  
496 senescence. *J. Postgrad. Med.* *53*, 207–213.
- 497 Hassall, C., Amaro, R., Ondina, P., Outeiro, A., Cordero-Rivera, A., and San Miguel, E. (2017).  
498 Population-level variation in senescence suggests an important role for temperature in an  
499 endangered mollusc. *J. Zool.* *301*, 32–40.

- 500 Hassall, M., Moss, A., Dixie, B., and Gilroy, J.J. (2018). Interspecific variation in responses to  
501 microclimate by terrestrial isopods: implications in relation to climate change. *ZooKeys* 801,  
502 5–24.
- 503 Johnson, S.N., and Jones, T.H. (2016). Introduction to global climate change and terrestrial  
504 invertebrates. In *global climate change and terrestrial invertebrates*, S.N. Johnson, and T.H.  
505 Jones, eds. (Chichester, UK: John Wiley & Sons, Ltd), pp. 1–8.
- 506 Johnson, S.N., Gregory, P.J., McNicol, J.W., Oodally, Y., Zhang, X., and Murray, P.J. (2010).  
507 Effects of soil conditions and drought on egg hatching and larval survival of the clover root  
508 weevil (*Sitona lepidus*). *Appl. Soil Ecol.* 44, 75–79.
- 509 Kelly, M.A., Zieba, A.P., Buttemer, W.A., and Hulbert, A.J. (2013). Effect of temperature on the  
510 rate of ageing: an experimental study of the blowfly *Calliphora stygia*. *PLoS One* 8, e73781.
- 511 Khadioli, N., Tonnang, Z.E.H., Muchugu, E., Ong'amo, G., Achia, T., Kipchirchir, I., Kroschel, J.,  
512 and Le Ru, B. (2014). Effect of temperature on the phenology of *Chilo partellus* (Swinhoe)  
513 (Lepidoptera, Crambidae); simulation and visualization of the potential future distribution of  
514 *C. partellus* in Africa under warmer temperatures through the development of life-table  
515 parameters. *Bull. Entomol. Res.* 104, 809–822.
- 516 Lawlor, L.R. (1976). Parental investment and offspring fitness in the terrestrial isopod  
517 *Armadillidium vulgare* (Latreille) (Crustacea: Oniscidea). *Evolution* 30, 775–785.
- 518 Lee, B.Y., Han, J.A., Im, J.S., Morrone, A., Johung, K., Goodwin, E.C., Kleijer, W.J., DiMaio, D.,  
519 and Hwang, E.S. (2006). Senescence-associated  $\beta$ -galactosidase is lysosomal  $\beta$ -galactosidase.  
520 *Aging Cell* 5, 187–195.
- 521 Lister, B.C., and Garcia, A. (2018). Climate-driven declines in arthropod abundance restructure  
522 a rainforest food web. *Proc. Natl. Acad. Sci.* 115, E10397–E10406.
- 523 Lopez-Martinez, G., Elnitsky, M.A., Benoit, J.B., Lee, R.E., and Denlinger, D.L. (2008). High  
524 resistance to oxidative damage in the Antarctic midge *Belgica antarctica*, and developmentally  
525 linked expression of genes encoding superoxide dismutase, catalase and heat shock proteins.  
526 *Insect Biochem. Mol. Biol.* 38, 796–804.
- 527 Maron, M., McAlpine, C.A., Watson, J.E.M., Maxwell, S., and Barnard, P. (2015). Climate-  
528 induced resource bottlenecks exacerbate species vulnerability: a review. *Divers. Distrib.* 21,  
529 731–743.
- 530 Masson-Delmotte, V., P. Zhai, A., and Pirani, S.L. (2021). IPCC, 2021: Climate Change 2021: The  
531 Physical Science Basis. Contribution of Working Group I to the Sixth Assessment Report of the  
532 Intergovernmental Panel on Climate Change.
- 533 Mocquard, J.P., Juchault, P., and Souty-Grosset, C. (1989). The role of environmental factors  
534 (temperature and photoperiod) in the reproduction of the terrestrial isopod *Armadillidium*  
535 *vulgare* (Latreille, 1804). *Monogr. Monit. Zool. Ital.* 4, 455–475.
- 536 Paoletti, M.G., and Hassall, M. (1999). Woodlice (Isopoda: Oniscidea): their potential for  
537 assessing sustainability and use as bioindicators. *Agric. Ecosyst. Environ.* 74, 157–165.

- 538 Paris, O.H., and Pitelka, F.A. (1962). Population characteristics of the terrestrial isopod  
539 *Armadillidium vulgare* in California grassland. *Ecology* 43, 229-248.
- 540 R Core Team (2022). R: A language and environment for statistical computing. R Foundation  
541 for Statistical Computing, Vienna, Austria. <https://www.R-project.org/>
- 542 Rodriguez, J., Boulo, V., Mialhe, E., and Bachere, E., 1995. Characterisation of shrimp  
543 haemocytes and plasma components by monoclonal antibodies. *J. Cell Sci.* 108, 1043–1050.
- 544 Sano, F., Asakawa, N., Inoue, Y., and Sakurai, M. (1999). A dual role for intracellular trehalose  
545 in the resistance of yeast cells to water stress. *Cryobiology* 39, 80–87.
- 546 Santos, J.C., de Almeida, W.R., and Fernandes, G.W. (2021). Arthropods: why it is so crucial to  
547 know their biodiversity? In measuring arthropod biodiversity, J.C. Santos, and G.W. Fernandes,  
548 eds. (Cham: Springer International Publishing), pp. 3–11.
- 549 Schielzeth, H. (2010). Simple means to improve the interpretability of regression coefficients.  
550 *Methods Ecol. Evol.* 1:103–113.
- 551 Smigel, J.T., and Gibbs, A.G. (2008). Conglobation in the pill bug, *Armadillidium vulgare*, as a  
552 water conservation mechanism. *J. Insect Sci.* 8.
- 553 Souty-Grosset, C., and Faberi, A. (2018). Effect of agricultural practices on terrestrial isopods:  
554 a review. *ZooKeys* 801, 63–96.
- 555 Souty-Grosset, C., Chentoufi, A., Mocquard, J.P., and Juchault, P. (1988). Seasonal  
556 reproduction in the terrestrial isopod *Armadillidium vulgare* (Latreille): geographical  
557 variability and genetic control of the response to photoperiod and temperature. *Int. J.*  
558 *Invertebr. Reprod. Dev.* 14, 131–151.
- 559 Souty-Grosset, C., Badenhauer, I., Reynolds, J.D., and Morel, A. (2005). Investigations  
560 on the potential of woodlice as bioindicators of grassland habitat quality. *Eur. J. Soil Biol.* 41,  
561 109–116.
- 562 Strachan, S.R., Chester, E.T., and Robson, B.J. (2015). Freshwater invertebrate life history  
563 strategies for surviving desiccation. *Springer Sci. Rev.* 3, 57–75.
- 564 Suzuki, S., and Ziegler, A. (2005). Structural investigation of the female genitalia and sperm-  
565 storage sites in the terrestrial isopod *Armadillidium vulgare* (Crustacea, Isopoda). *Arthropod*  
566 *Struct. Dev.* 34, 441–454.
- 567 Tang, X., and Pikal, M.J. (2005). Measurement of the kinetics of protein unfolding in viscous  
568 systems and implications for protein stability in freeze-drying. *Pharm. Res.* 22, 1176–1185.
- 569 Therneau, T. (2022). A Package for Survival Analysis in R. R package version 3.3-1,  
570 <https://CRAN.R-project.org/package=survival>.
- 571 Trenberth, K.E., Dai, A., van der Schrier, G., Jones, P.D., Barichivich, J., Briffa, K.R., and  
572 Sheffield, J. (2014). Global warming and changes in drought. *Nat. Clim. Change* 4, 17–22.

573 Verberk, W.C.E.P., Sipel, H., and Esselink, H. (2008). Life-history strategies in freshwater  
574 macroinvertebrates. *Freshw. Biol.* 53, 1722–1738.

575

576

577 **Supplementary File 1: Comparison of the two control groups**

578

579 *Table 1: Comparison between the two control groups (CT (Control Temperature) and CM (Control Moisture)) of the two*  
580 *experiments for each tested variable (in bold the variables with significant statistical differences with graphical associated*  
581 *figures (Fig. 1, Fig. 2 and Fig. 3))*

| Traits                                           | Statistical value                      | P-value             |
|--------------------------------------------------|----------------------------------------|---------------------|
| <u>Life history traits measures</u>              |                                        |                     |
| Survival                                         | $\chi_1^2 = 1.25$                      | P = 0.26            |
| Body mass ( <b>day 14</b> )                      | <b><math>F_{1,111} = 13.00</math>,</b> | <b>P &lt; 0.001</b> |
| Reproduction                                     | $\chi_1^2 = 0.417$                     | P = 0.52            |
| <u>Physiological traits measures</u>             |                                        |                     |
| <i>Immune cells parameters</i>                   |                                        |                     |
| Density                                          | <b><math>F_{1,50} = 6.21</math></b>    | <b>P = 0.016</b>    |
| Viability                                        | $F_{1,50} = 2.49$                      | P = 0.12            |
| Size                                             | $F_{1,50} = 0.029$                     | P = 0.86            |
| <b><math>\beta</math>-galactosidase activity</b> | $F_{1,49} = 17.0$                      | <b>P &lt; 0.001</b> |

582

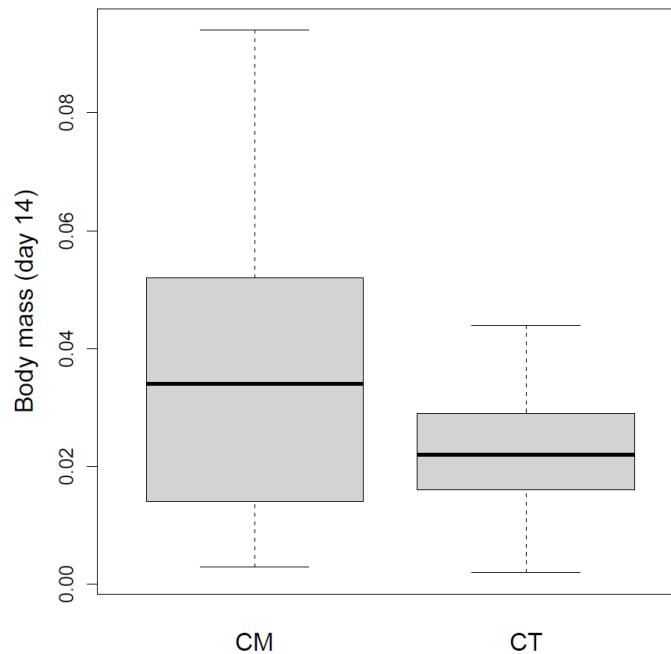

583

584

585

*Figure 1: Body mass comparison between the two control groups (CT (Control Temperature) and CM (Control Moisture)) P-value < 0.001*



586

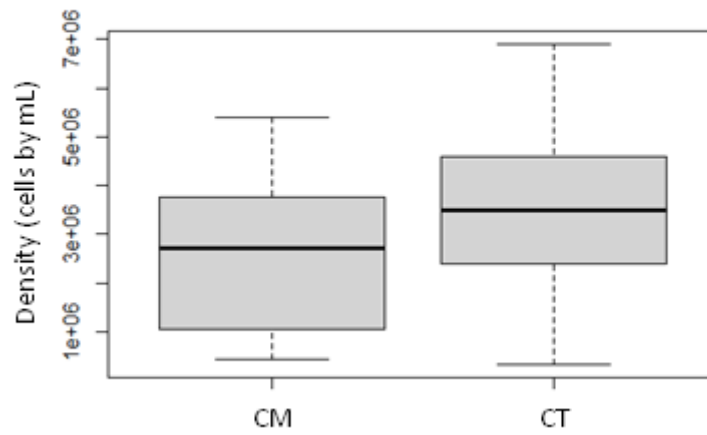

587

588

589

Figure 2: Immune cells density comparison between the two control groups (CT (Control Temperature) and CM (Control Moisture)) P-value=0.02

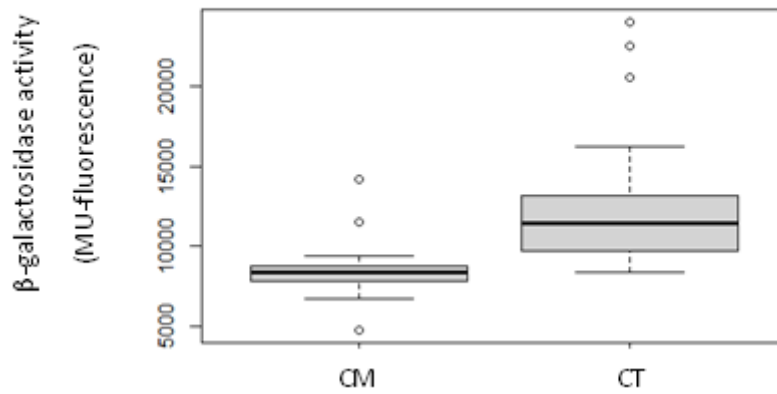

590

591

592

593

594

595

Figure 3: beta-galactosidase activity comparison between the two control groups (CT (Control Temperature) and CM (Control Moisture)) P-value<0.001

596 **Supplementary File 2: Model selection**

597

598 **Life history trait**

599 **Survival**

600 **Table S2a.** Effect of the thermal stress condition and sex on the survival. For each model, we reported  
 601 intercept of the regression, adjusted R<sup>2</sup> (adj.R<sup>2</sup>), degree of freedom (df), Log likelihood (LogLik) values,  
 602 Akaike information criteria values with a correction for small sample sizes (AICc), change in AICc  
 603 ( $\Delta$ AICc) from the best model, and model weight. The presence of the categorial variable (sex, stress  
 604 condition, and their interaction term sex:stress) in the model is indicated by a “+” symbol.

| Intercept | sex | stress | sex:stress | adj.R <sup>2</sup> | df       | logLik         | AICc          | $\Delta$ AICc | weight      |
|-----------|-----|--------|------------|--------------------|----------|----------------|---------------|---------------|-------------|
| +         |     | +      |            | 0,08               | 1        | -125,01        | 252,18        | 0,00          | 0,31        |
| +         |     |        |            | <b>0,00</b>        | <b>0</b> | <b>-126,09</b> | <b>252,19</b> | <b>0,01</b>   | <b>0,31</b> |
| +         | +   |        |            | 0,02               | 1        | -125,82        | 253,81        | 1,62          | 0,14        |
| +         | +   | +      |            | 0,10               | 2        | -124,70        | 253,89        | 1,71          | 0,13        |
| +         | +   | +      | +          | 0,17               | 3        | -123,65        | 254,34        | 2,16          | 0,11        |

605

606 **Table S2b.** Effect of the water stress condition and sex on the survival. For each model, we reported  
 607 intercept of the regression, adjusted R<sup>2</sup> (adj.R<sup>2</sup>), degree of freedom (df), Log likelihood (LogLik) values,  
 608 Akaike information criteria values with a correction for small sample sizes (AICc), change in AICc  
 609 ( $\Delta$ AICc) from the best model, and model weight. The presence of the categorial variable (sex, stress  
 610 condition, and their interaction term sex:stress) in the model is indicated by a “+” symbol. The most  
 611 parsimonious model is highlighted in bold font.

| Intercept | sex | stress | sex:stress | adj.R <sup>2</sup> | df       | logLik        | AICc          | $\Delta$ AICc | weight      |
|-----------|-----|--------|------------|--------------------|----------|---------------|---------------|---------------|-------------|
| +         |     | +      |            | <b>0,20</b>        | <b>1</b> | <b>-91,25</b> | <b>184,72</b> | <b>0,00</b>   | <b>0,53</b> |
| +         | +   | +      |            | 0,22               | 2        | -91,02        | 186,75        | 2,02          | 0,19        |
| +         |     |        |            | 0,00               | 0        | -93,52        | 187,04        | 2,32          | 0,17        |
| +         | +   |        |            | 0,02               | 1        | -93,32        | 188,87        | 4,15          | 0,07        |
| +         | +   | +      | +          | 0,23               | 3        | -90,94        | 189,39        | 4,67          | 0,05        |

612

613

614

615 **Body mass**

616 **Table S2c.** Effect of the thermal stress condition, sex and day on body mass. For each model, we  
 617 reported intercept of the regression, adjusted  $R^2$  (adj. $R^2$ ), degree of freedom (df), Log likelihood  
 618 (LogLik) values, Akaike information criteria values with a correction for small sample sizes (AICc),  
 619 change in AICc ( $\Delta$ AICc) from the best model, and model weight. The presence of the categorical variable  
 620 (sex, stress condition, and their two-by-two interaction terms) in the model is indicated by a “+”  
 621 symbol. The regression parameter is only given for the corresponding continuous variable (day) when  
 622 this variable is present in the model. The most parsimonious model is highlighted in bold font.  
 623

| Intercept   | day         | sex | stress | day:sex | day:stress | sex:stress | adj.R <sup>2</sup> | df       | logLik         | AICc           | $\Delta$ AICc | weight      |
|-------------|-------------|-----|--------|---------|------------|------------|--------------------|----------|----------------|----------------|---------------|-------------|
| 0,02        | 0,00        | +   | +      | +       | +          | +          | -0,01              | 8        | 1444,54        | 2872,80        | 0,00          | 0,63        |
| <b>0,02</b> | <b>0,00</b> | +   | +      |         | +          | +          | <b>-0,01</b>       | <b>7</b> | <b>1442,55</b> | <b>2870,90</b> | <b>1,91</b>   | <b>0,24</b> |
| 0,02        | 0,00        | +   | +      | +       | +          |            | -0,01              | 7        | 1441,20        | 2868,18        | 4,62          | 0,06        |
| 0,02        | 0,00        |     | +      |         | +          |            | -0,01              | 5        | 1438,73        | 2867,35        | 5,45          | 0,04        |
| 0,02        | 0,00        | +   | +      |         | +          |            | -0,01              | 6        | 1439,08        | 2866,01        | 6,79          | 0,02        |
| 0,02        | 0,00        | +   | +      | +       |            | +          | -0,01              | 7        | 1436,82        | 2859,43        | 13,37         | 0,00        |
| 0,03        | 0,00        | +   | +      |         |            | +          | -0,01              | 6        | 1435,27        | 2858,39        | 14,41         | 0,00        |
| 0,02        | 0,00        | +   | +      | +       |            |            | -0,01              | 6        | 1433,45        | 2854,75        | 18,05         | 0,00        |
| 0,03        | 0,00        |     | +      |         |            |            | -0,01              | 4        | 1431,36        | 2854,64        | 18,16         | 0,00        |
| 0,02        | 0,00        | +   | +      |         |            |            | -0,01              | 5        | 1431,79        | 2853,47        | 19,33         | 0,00        |
| 0,02        | 0,00        | +   |        | +       |            |            | -0,01              | 5        | 1431,45        | 2852,78        | 20,02         | 0,00        |
| 0,02        | 0,00        |     |        |         |            |            | -0,01              | 3        | 1429,38        | 2852,71        | 20,09         | 0,00        |
| 0,02        | 0,00        | +   |        |         |            |            | -0,01              | 4        | 1429,89        | 2851,71        | 21,09         | 0,00        |
| 0,05        |             |     | +      |         |            |            | 0,00               | 3        | 1179,76        | 2353,47        | 519,33        | 0,00        |
| 0,05        |             |     |        |         |            |            | 0,00               | 2        | 1178,27        | 2352,52        | 520,28        | 0,00        |
| 0,05        |             | +   | +      |         |            |            | 0,00               | 4        | 1179,85        | 2351,62        | 521,18        | 0,00        |
| 0,06        |             | +   | +      |         |            | +          | 0,00               | 5        | 1180,51        | 2350,91        | 521,90        | 0,00        |
| 0,05        |             | +   |        |         |            |            | 0,00               | 3        | 1178,39        | 2350,74        | 522,06        | 0,00        |

624

625

626

627 **Table S2d.** Effect of the water stress condition, sex and day on body mass. For each model, we reported  
 628 intercept of the regression, adjusted R<sup>2</sup> (adj.R<sup>2</sup>), degree of freedom (df), Log likelihood (LogLik) values,  
 629 Akaike information criteria values with a correction for small sample sizes (AICc), change in AICc  
 630 ( $\Delta$ AICc) from the best model, and model weight. The presence of the categorial variable (sex, stress  
 631 condition, and their two-by-two interaction terms) in the model is indicated by a “+” symbol. The  
 632 regression parameter is only given for the corresponding continuous variable (day) when this variable  
 633 is present in the model. The most parsimonious model is highlighted in bold font.

634

| Intercept   | day         | sex | stress | day:sex | day:stress | sex:stress | adj.R <sup>2</sup> | df       | logLik         | AICc           | $\Delta$ AICc | weight      |
|-------------|-------------|-----|--------|---------|------------|------------|--------------------|----------|----------------|----------------|---------------|-------------|
| <b>0,04</b> | <b>0,00</b> |     |        |         |            |            | <b>0,00</b>        | <b>3</b> | <b>1309,82</b> | <b>2613,60</b> | <b>0,00</b>   | <b>0,29</b> |
| 0,04        | 0,00        |     | +      |         | +          |            | 0,00               | 5        | 1311,34        | 2612,57        | 1,03          | 0,17        |
| 0,04        | 0,00        | +   |        |         |            |            | 0,00               | 4        | 1310,00        | 2611,93        | 1,68          | 0,12        |
| 0,04        | 0,00        |     | +      |         |            |            | 0,00               | 4        | 1309,98        | 2611,89        | 1,72          | 0,12        |
| 0,04        | 0,00        | +   | +      |         | +          |            | 0,00               | 6        | 1311,50        | 2610,85        | 2,76          | 0,07        |
| 0,04        | 0,00        | +   | +      |         |            |            | 0,00               | 5        | 1310,18        | 2610,24        | 3,37          | 0,05        |
| 0,04        | 0,00        | +   |        | +       |            |            | 0,00               | 5        | 1310,01        | 2609,90        | 3,70          | 0,04        |
| 0,04        | 0,00        | +   | +      |         | +          | +          | 0,00               | 7        | 1311,79        | 2609,37        | 4,24          | 0,03        |
| 0,04        | 0,00        | +   | +      | +       | +          |            | 0,00               | 7        | 1311,50        | 2608,79        | 4,81          | 0,03        |
| 0,04        | 0,00        | +   | +      |         |            | +          | 0,00               | 6        | 1310,48        | 2608,79        | 4,82          | 0,03        |
| 0,04        | 0,00        | +   | +      | +       |            |            | 0,00               | 6        | 1310,18        | 2608,21        | 5,40          | 0,02        |
| 0,04        | 0,00        | +   | +      | +       | +          | +          | 0,00               | 8        | 1311,79        | 2607,30        | 6,30          | 0,01        |
| 0,04        | 0,00        | +   | +      | +       |            | +          | 0,00               | 7        | 1310,49        | 2606,75        | 6,85          | 0,01        |
| 0,05        |             |     |        |         |            |            | 0,00               | 2        | 1272,47        | 2540,92        | 72,68         | 0,00        |
| 0,05        |             | +   |        |         |            |            | 0,00               | 3        | 1272,59        | 2539,13        | 74,47         | 0,00        |
| 0,05        |             |     | +      |         |            |            | 0,00               | 3        | 1272,57        | 2539,10        | 74,50         | 0,00        |
| 0,05        |             | +   | +      |         |            |            | 0,00               | 4        | 1272,70        | 2537,32        | 76,28         | 0,00        |
| 0,05        |             | +   | +      |         |            | +          | 0,00               | 5        | 1272,79        | 2535,47        | 78,13         | 0,00        |

635

636

637 **Reproductive success**

638 **Table S2e.** Effect of the thermal stress condition on the reproductive success. For each model, we  
 639 reported intercept of the regression, adjusted  $R^2$  (adj. $R^2$ ), degree of freedom (df), Log likelihood  
 640 (LogLik) values, Akaike information criteria values with a correction for small sample sizes (AICc),  
 641 change in AICc ( $\Delta$ AICc) from the best model, and model weight. The presence of the categorial variable  
 642 (stress condition) in the model is indicated by a “+” symbol. The value of regression parameter is only  
 643 given for the intercept. The most parsimonious model is highlighted in bold font.

| Intercept   | stress   | adj. $R^2$  | df       | logLik        | AICc         | $\Delta$ AICc | weight      |
|-------------|----------|-------------|----------|---------------|--------------|---------------|-------------|
| <b>0,62</b> | <b>+</b> | <b>0,16</b> | <b>2</b> | <b>-25,17</b> | <b>54,66</b> | <b>0,00</b>   | <b>0,80</b> |
| -0,10       |          | 0,00        | 1        | -27,68        | 57,46        | 2,80          | 0,20        |

644

645 **Table S2f.** Effect of the water stress condition on the reproductive success. For each model, we  
 646 reported intercept of the regression, adjusted  $R^2$  (adj. $R^2$ ), degree of freedom (df), Log likelihood  
 647 (LogLik) values, Akaike information criteria values with a correction for small sample sizes (AICc),  
 648 change in AICc ( $\Delta$ AICc) from the best model, and model weight. The presence of the categorial variable  
 649 (stress condition) in the model is indicated by a “+” symbol. The value of regression parameter is only  
 650 given for the intercept. The most parsimonious model is highlighted in bold font.

| Intercept    | stress   | adj. $R^2$  | df       | logLik        | AICc         | $\Delta$ AICc | weight      |
|--------------|----------|-------------|----------|---------------|--------------|---------------|-------------|
| <b>-1,39</b> | <b>+</b> | <b>0,17</b> | <b>2</b> | <b>-23,77</b> | <b>51,87</b> | <b>0,00</b>   | <b>0,83</b> |
| -0,51        |          | 0,00        | 1        | -26,46        | 55,03        | 3,16          | 0,17        |

651

652

653 **Individual physiological traits**

654 **Immune cell viability**

655 **Table S2g.** Effect of the thermal stress condition and sex on immune cell viability. For each model, we  
 656 reported intercept of the regression, adjusted  $R^2$  (adj. $R^2$ ), degree of freedom (df), Log likelihood  
 657 (LogLik) values, Akaike information criteria values with a correction for small sample sizes (AICc),  
 658 change in AICc ( $\Delta$ AICc) from the best model, and model weight. The presence of the categorial variable  
 659 (sex, stress condition, and their interaction term sex:stress) in the model is indicated by a “+” symbol.  
 660 The value of regression parameter is only given for the intercept. The most parsimonious model is  
 661 highlighted in bold font.

| Intercept    | sex | stress | sex:stress | adj. $R^2$  | df       | logLik         | AICc          | $\Delta$ AICc | weight      |
|--------------|-----|--------|------------|-------------|----------|----------------|---------------|---------------|-------------|
| <b>60,31</b> |     |        |            | <b>0,00</b> | <b>2</b> | <b>-231,04</b> | <b>466,30</b> | <b>0,00</b>   | <b>0,47</b> |
| 61,97        |     | +      |            | 0,02        | 3        | -230,57        | 467,58        | 1,28          | 0,25        |
| 61,00        | +   |        |            | 0,00        | 3        | -230,97        | 468,39        | 2,08          | 0,17        |
| 62,43        | +   | +      |            | 0,02        | 4        | -230,53        | 469,81        | 3,51          | 0,08        |
| 63,67        | +   | +      | +          | 0,03        | 5        | -230,24        | 471,63        | 5,32          | 0,03        |

662

663 **Table S2h.** Effect of the water stress condition and sex on immune cell viability. For each model, we  
 664 reported intercept of the regression, adjusted  $R^2$  (adj. $R^2$ ), degree of freedom (df), Log likelihood  
 665 (LogLik) values, Akaike information criteria values with a correction for small sample sizes (AICc),  
 666 change in AICc ( $\Delta$ AICc) from the best model, and model weight. The presence of the categorial variable  
 667 (sex, stress condition, and their interaction term sex:stress) in the model is indicated by a “+” symbol.  
 668 The value of regression parameter is only given for the intercept. The most parsimonious model is  
 669 highlighted in bold font.

| Intercept    | sex | stress | sex:stress | adj. $R^2$  | df       | logLik         | AICc          | $\Delta$ AICc | weight      |
|--------------|-----|--------|------------|-------------|----------|----------------|---------------|---------------|-------------|
| 51,82        | +   | +      |            | 0,15        | 4        | -212,23        | 433,32        | 0,00          | 0,48        |
| <b>47,45</b> |     | +      |            | <b>0,08</b> | <b>3</b> | <b>-214,36</b> | <b>435,21</b> | <b>1,90</b>   | <b>0,19</b> |
| 52,29        | +   | +      | +          | 0,15        | 5        | -212,20        | 435,70        | 2,39          | 0,15        |
| 55,52        | +   |        |            | 0,06        | 3        | -214,86        | 436,23        | 2,91          | 0,11        |
| 51,29        |     |        |            | 0,00        | 2        | -216,44        | 437,13        | 3,81          | 0,07        |

670

671

672 **Immune cell size**

673 **Table S2i.** Effect of the thermal stress condition and sex on immune cell size. For each model, we  
 674 reported intercept of the regression, adjusted  $R^2$  (adj. $R^2$ ), degree of freedom (df), Log likelihood  
 675 (LogLik) values, Akaike information criteria values with a correction for small sample sizes (AICc),  
 676 change in AICc ( $\Delta$ AICc) from the best model, and model weight. The presence of the categorial variable  
 677 (sex, stress condition, and their interaction term sex:stress) in the model is indicated by a “+” symbol.  
 678 The value of regression parameter is only given for the intercept. The most parsimonious model is  
 679 highlighted in bold font.

| Intercept   | sex | stress | sex:stress | adj. $R^2$  | df       | logLik        | AICc         | $\Delta$ AICc | weight      |
|-------------|-----|--------|------------|-------------|----------|---------------|--------------|---------------|-------------|
| 7,91        | +   | +      | +          | 0,25        | 5        | -29,17        | 69,50        | 0,00          | 0,32        |
| 7,99        | +   | +      |            | 0,20        | 4        | -30,45        | 69,66        | 0,17          | 0,30        |
| <b>7,91</b> |     | +      |            | <b>0,15</b> | <b>3</b> | <b>-31,64</b> | <b>69,73</b> | <b>0,23</b>   | <b>0,29</b> |
| 7,87        | +   |        |            | 0,07        | 3        | -33,33        | 73,09        | 3,60          | 0,05        |
| 7,77        |     |        |            | 0,00        | 2        | -34,79        | 73,80        | 4,30          | 0,04        |

680

681 **Table S2j.** Effect of the water stress condition and sex on immune cell size. For each model, we  
 682 reported intercept of the regression, adjusted  $R^2$  (adj. $R^2$ ), degree of freedom (df), Log likelihood  
 683 (LogLik) values, Akaike information criteria values with a correction for small sample sizes (AICc),  
 684 change in AICc ( $\Delta$ AICc) from the best model, and model weight. The presence of the categorial variable  
 685 (sex, stress condition, and their interaction term sex:stress) in the model is indicated by a “+” symbol.  
 686 The value of regression parameter is only given for the intercept. The most parsimonious model is  
 687 highlighted in bold font.

| Intercept   | sex | stress | sex:stress | adj. $R^2$  | df       | logLik        | AICc         | $\Delta$ AICc | weight      |
|-------------|-----|--------|------------|-------------|----------|---------------|--------------|---------------|-------------|
| 8,24        |     | +      |            | 0,08        | 3        | -44,46        | 95,42        | 0,00          | 0,45        |
| <b>8,10</b> |     |        |            | <b>0,00</b> | <b>2</b> | <b>-46,36</b> | <b>96,97</b> | <b>1,54</b>   | <b>0,21</b> |
| 8,17        | +   | +      |            | 0,10        | 4        | -44,10        | 97,06        | 1,63          | 0,20        |
| 8,04        | +   |        |            | 0,01        | 3        | -46,16        | 98,81        | 3,39          | 0,08        |
| 8,19        | +   | +      | +          | 0,10        | 5        | -44,06        | 99,42        | 4,00          | 0,06        |

688

689

690 **Immune cell density**

691 **Table S2k.** Effect of the thermal stress condition and sex on immune cell density. For each model, we  
 692 reported intercept of the regression, adjusted  $R^2$  (adj. $R^2$ ), degree of freedom (df), Log likelihood  
 693 (LogLik) values, Akaike information criteria values with a correction for small sample sizes (AICc),  
 694 change in AICc ( $\Delta$ AICc) from the best model, and model weight. The presence of the categorial variable  
 695 (sex, stress condition, and their interaction term sex:stress) in the model is indicated by a “+” symbol.  
 696 The value of regression parameter is only given for the intercept. The most parsimonious model is  
 697 highlighted in bold font.

| Intercept         | sex | stress | sex:stress | adj. $R^2$  | df       | logLik         | AICc           | $\Delta$ AICc | weight      |
|-------------------|-----|--------|------------|-------------|----------|----------------|----------------|---------------|-------------|
| <b>3538275,86</b> |     | +      |            | <b>0,41</b> | <b>3</b> | <b>-898,33</b> | <b>1803,10</b> | <b>0,00</b>   | <b>0,66</b> |
| 3644762,62        | +   | +      |            | 0,41        | 4        | -898,12        | 1804,99        | 1,89          | 0,26        |
| 3600666,67        | +   | +      | +          | 0,41        | 5        | -898,08        | 1807,31        | 4,22          | 0,08        |
| 2472758,62        |     |        |            | 0,00        | 2        | -913,43        | 1831,07        | 27,98         | 0,00        |
| 2707777,78        | +   |        |            | 0,02        | 3        | -912,92        | 1832,29        | 29,20         | 0,00        |

698

699 **Table S2l.** Effect of the water stress condition and sex on immune cell density. For each model, we  
 700 reported intercept of the regression, adjusted  $R^2$  (adj. $R^2$ ), degree of freedom (df), Log likelihood  
 701 (LogLik) values, Akaike information criteria values with a correction for small sample sizes (AICc),  
 702 change in AICc ( $\Delta$ AICc) from the best model, and model weight. The presence of the categorial variable  
 703 (sex, stress condition, and their interaction term sex:stress) in the model is indicated by a “+” symbol.  
 704 The value of regression parameter is only given for the intercept. The most parsimonious model is  
 705 highlighted in bold font.

| Intercept         | sex | stress | sex:stress | adj. $R^2$  | df       | logLik         | AICc           | $\Delta$ AICc | weight      |
|-------------------|-----|--------|------------|-------------|----------|----------------|----------------|---------------|-------------|
| <b>1465517,24</b> |     | +      |            | <b>0,13</b> | <b>3</b> | <b>-802,79</b> | <b>1612,09</b> | <b>0,00</b>   | <b>0,52</b> |
| 1827142,86        | +   | +      | +          | 0,18        | 5        | -801,23        | 1613,77        | 1,68          | 0,23        |
| 1575106,08        | +   | +      |            | 0,14        | 4        | -802,60        | 1614,06        | 1,97          | 0,20        |
| 1892500,00        |     |        |            | 0,00        | 2        | -806,49        | 1617,23        | 5,14          | 0,04        |
| 1960434,78        | +   |        |            | 0,00        | 3        | -806,44        | 1619,38        | 7,29          | 0,01        |

706

707



708  **$\beta$ -Galactosidase activity**

709 **Table S2m.** Effect of the thermal stress condition and sex on  $\beta$ -Galactosidase activity. For each model,  
 710 we reported intercept of the regression, adjusted  $R^2$  (adj. $R^2$ ), degree of freedom (df), Log likelihood  
 711 (LogLik) values, Akaike information criteria values with a correction for small sample sizes (AICc),  
 712 change in AICc ( $\Delta$ AICc) from the best model, and model weight. The presence of the categorial variable  
 713 (sex, stress condition, and their interaction term sex:stress) in the model is indicated by a “+” symbol.  
 714 The value of regression parameter is only given for the intercept. The most parsimonious model is  
 715 highlighted in bold font.

| Intercept       | sex | stress | sex:stress | adj. $R^2$  | df       | logLik         | AICc           | $\Delta$ AICc | weight      |
|-----------------|-----|--------|------------|-------------|----------|----------------|----------------|---------------|-------------|
| <b>12399,83</b> |     | +      |            | <b>0,17</b> | <b>3</b> | <b>-556,53</b> | <b>1119,51</b> | <b>0,00</b>   | <b>0,60</b> |
| 12988,70        | +   | +      |            | 0,18        | 4        | -556,14        | 1121,06        | 1,55          | 0,28        |
| 12487,80        | +   | +      | +          | 0,19        | 5        | -555,81        | 1122,82        | 3,30          | 0,11        |
| 14534,95        |     |        |            | 0,00        | 2        | -561,86        | 1127,94        | 8,42          | 0,01        |
| 15052,70        | +   |        |            | 0,01        | 3        | -561,62        | 1129,71        | 10,20         | 0,00        |

716

717 **Table S2n.** Effect of the water stress condition and sex on  $\beta$ -Galactosidase activity. For each model, we  
 718 reported intercept of the regression, adjusted  $R^2$  (adj. $R^2$ ), degree of freedom (df), Log likelihood  
 719 (LogLik) values, Akaike information criteria values with a correction for small sample sizes (AICc),  
 720 change in AICc ( $\Delta$ AICc) from the best model, and model weight. The presence of the categorial variable  
 721 (sex, stress condition, and their interaction term sex:stress) in the model is indicated by a “+” symbol.  
 722 The value of regression parameter is only given for the intercept. The most parsimonious model is  
 723 highlighted in bold font.

724

| Intercept       | sex | stress | sex:stress | adj. $R^2$  | df       | logLik         | AICc          | $\Delta$ AICc | weight      |
|-----------------|-----|--------|------------|-------------|----------|----------------|---------------|---------------|-------------|
| <b>10694,60</b> |     | +      |            | <b>0,17</b> | <b>3</b> | <b>-477,96</b> | <b>962,43</b> | <b>0,00</b>   | <b>0,67</b> |
| 10867,90        | +   | +      |            | 0,18        | 4        | -477,84        | 964,53        | 2,10          | 0,23        |
| 10955,89        | +   | +      | +          | 0,18        | 5        | -477,79        | 966,89        | 4,47          | 0,07        |
| 9725,79         |     |        |            | 0,00        | 2        | -482,92        | 970,08        | 7,65          | 0,01        |
| 10087,84        | +   |        |            | 0,01        | 3        | -482,55        | 971,60        | 9,17          | 0,01        |

725

726

727 **Supplementary file 3: Graphical representations of results per sex**

728

729 **1. Life history traits**

730 **1.A. Survival**

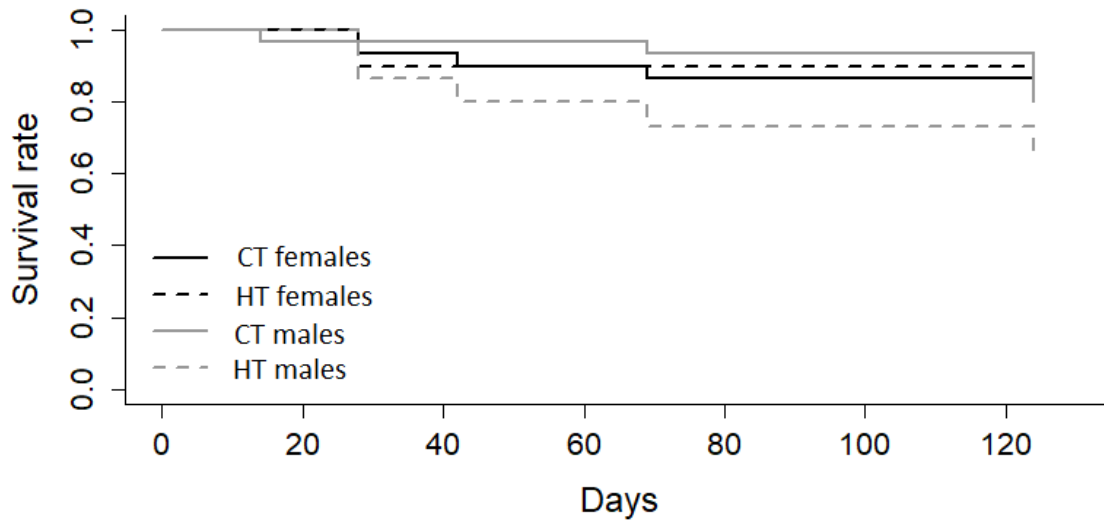

731

732 **Figure 1.A.1: Effect of thermal stress on survival**

733 *CT females: control females in Control Temperature (20°C), HT females: stressed females in High Temperature (28°C), CT*  
734 *males: control males in Control Temperature (20°C), HT males: stressed males in High Temperature (28°C)*

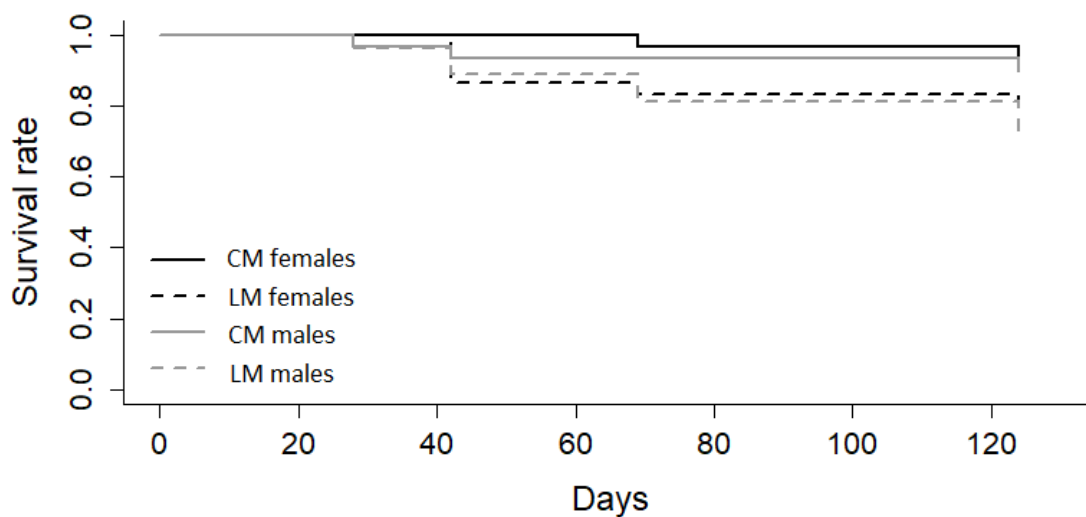

735

736 **Figure 1.A.2.: Effect of water stress on survival**

737 *CM females: control females in Control Moisture (moisture 80%), LM females: stressed females in Loss of Moisture (moisture*  
738 *50%), CM males: control males in Control Moisture (moisture 80%), LM males: stressed males in Loss of Moisture (moisture*  
739 *50%)*

740

741

742

743 1.B. Body mass across time

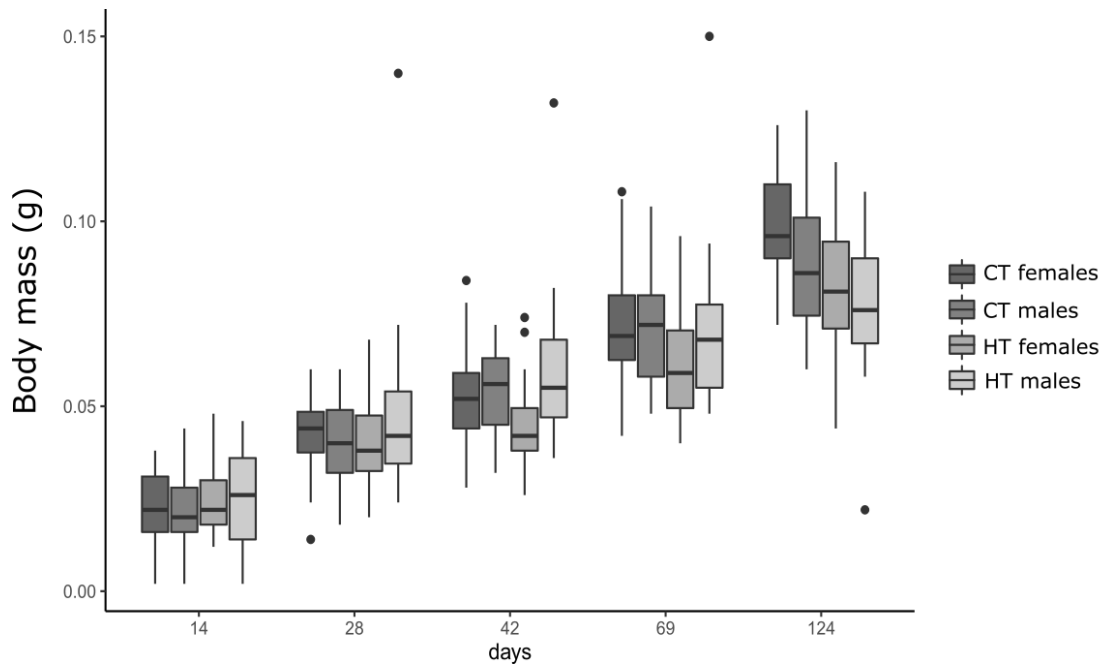

744

745 **Figure 1.B.1.: Boxplot of the effect of thermal stress on body mass (measured in grams) over time**  
746 *CT females: control females in Control Temperature (20°C), HT females: stressed females in High Temperature (28°C), CT*  
747 *males: control males in Control Temperature (20°C), HT males: stressed males in High Temperature (28°C)*

748

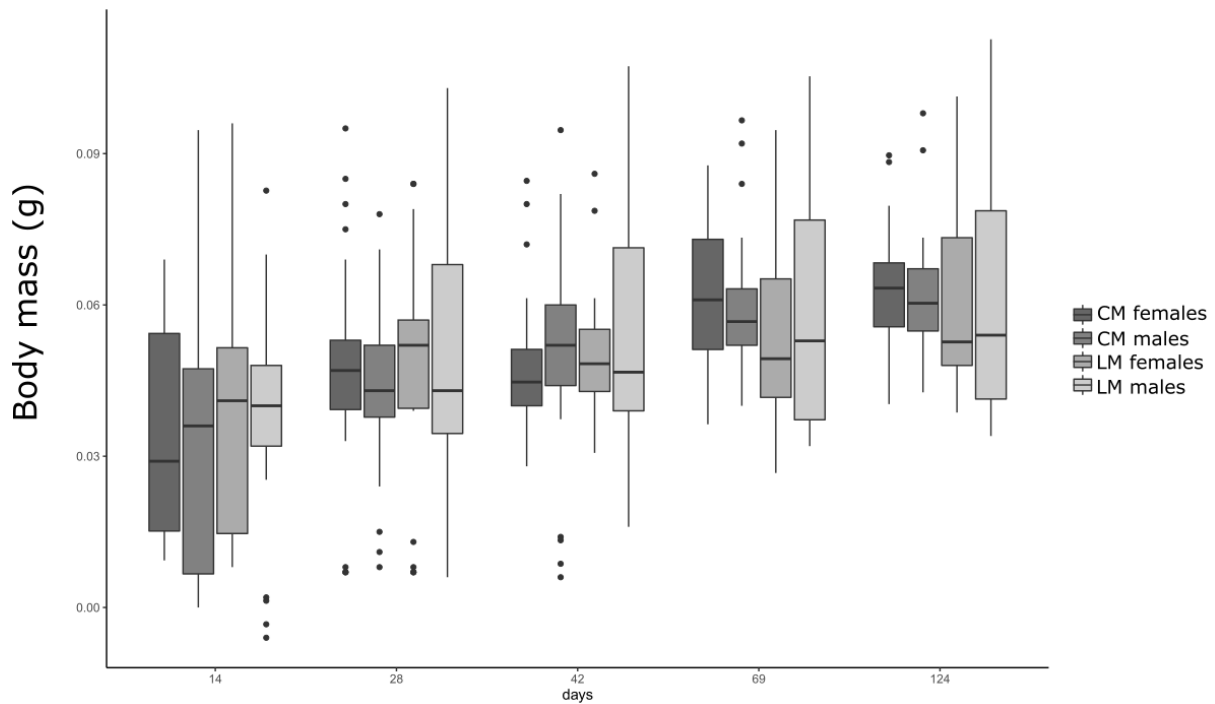

749

750 **Figure 1.B.2.: Boxplot of the effect of water stress on body mass (measured in grams) over time**  
751 *CM females: control females in Control Moisture (moisture 80%), LM females: stressed females in Loss of Moisture (moisture*  
752 *50%), CM males: control males in Control Moisture (moisture 80%), LM males: stressed males in Loss of Moisture (moisture*  
753 *50%)*

754

755 1.C. Reproduction success

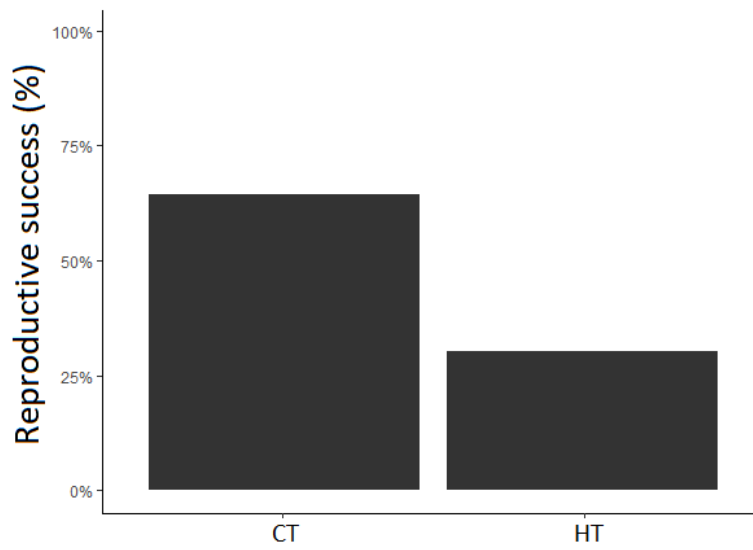

756

757 **Figure 1.C.1.: Effect of temperature on breeding success** (0 = pairs that did not produce offspring; 1 = pairs that produced  
758 offspring; CT: control individuals in Control Temperature (20°C), HT: Stressed individuals in High Temperature (28°C))

759

760

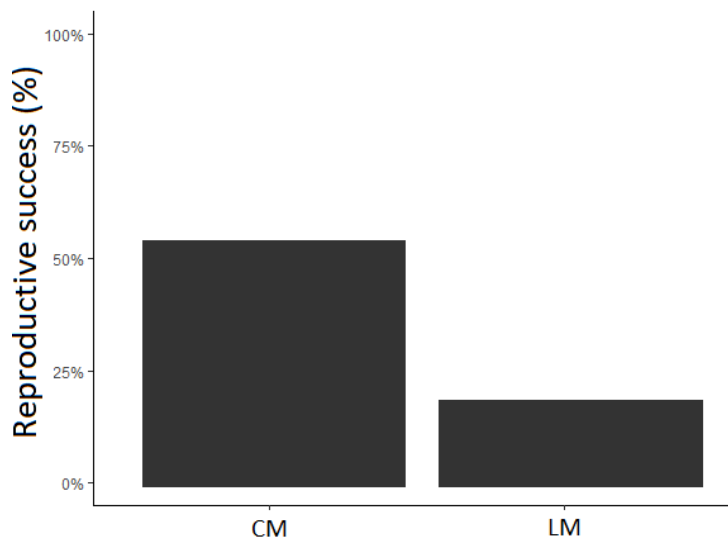

761

762 **Figure 1.C.2.: Effect of moisture on breeding success** (0 = pairs that did not produce offspring; 1 = pairs that produced  
763 offspring; CM: control individuals in Control Moisture (moisture 80%), LM females: stressed individuals in Loss of Moisture  
764 (moisture 50%))

765

766

767

768

769

770

771

772 **2. Individual physiological traits**

773 **2.A. Immune cells viability**

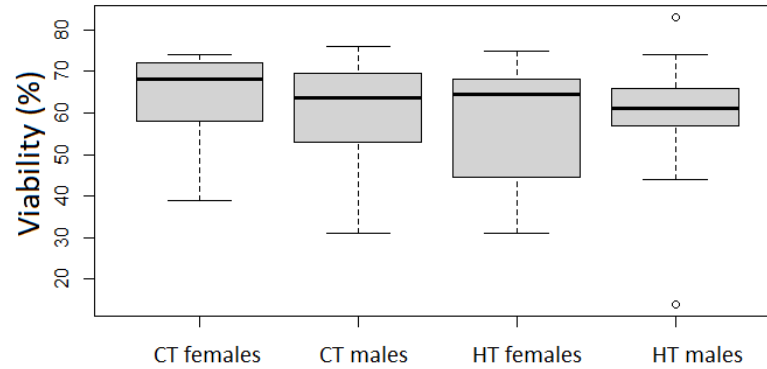

774

775

776

777

778

**Figure 2.A.1.: Effect of thermal stress on immune cell viability (% of live cells)**

CT females: control females in Control Temperature (20°C), HT females: stressed females in High Temperature (28°C), CT males: control males in Control Temperature (20°C), HT males: stressed males in High Temperature (28°C)

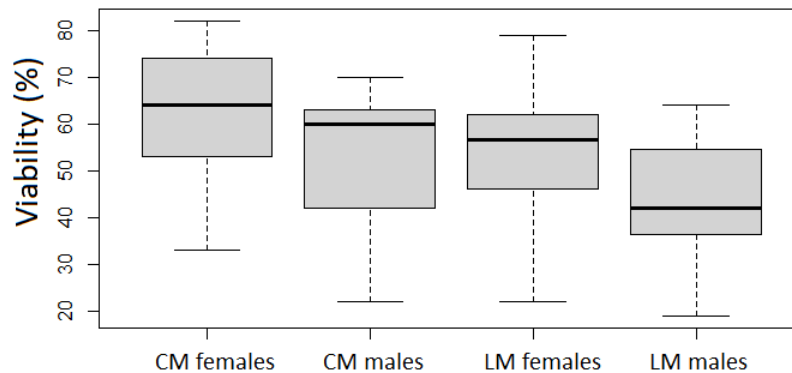

779

780

781

782

783

784

785

786

787

788

789

790

791

792

793

**Figure 2.A.2.: Effect of water stress on immune cell viability (% of live cells)**

CM females: control females in Control Moisture (moisture 80%), LM females: stressed females in Loss of Moisture (moisture 50%), CM males: control males in Control Moisture (moisture 80%), LM males: stressed males in Loss of Moisture (moisture 50%)

794 **2.B. Immune cells size**

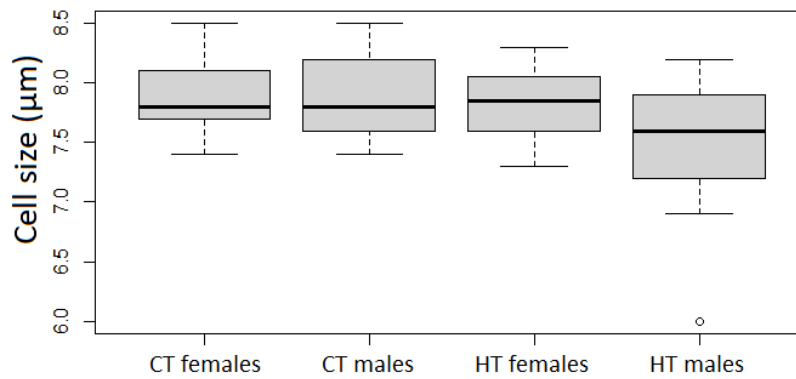

795

796

**Figure 2.B.1.: Effect of thermal stress on immune cells size (in  $\mu\text{m}$ )**

797 *CT females: control females in Control Temperature (20°C), HT females: stressed females in High Temperature (28°C), CT*  
798 *males: control males in Control Temperature (20°C), HT males: stressed males in High Temperature (28°C)*

799

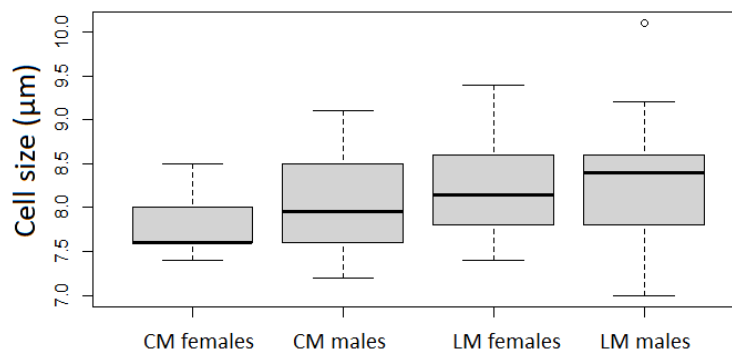

800

801

**Figure 2.B.2.: Effect of water stress on immune cells size (in  $\mu\text{m}$ )**

802 *CM females: control females in Control Moisture (moisture 80%), LM females: stressed females in Loss of Moisture (moisture*  
803 *50%), CM males: control males in Control Moisture (moisture 80%), LM males: stressed males in Loss of Moisture (moisture*  
804 *50%)*

805

806

807 **2.C. Immune cells density**

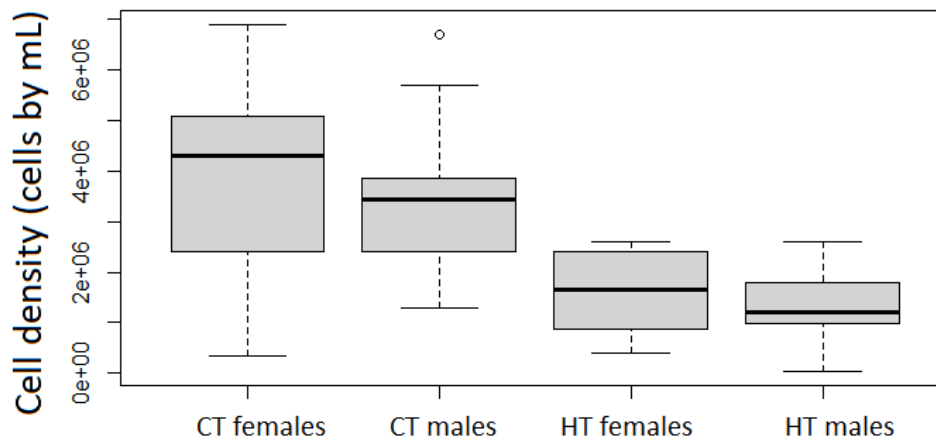

808

809

810

811

**Figure 2.C.1.: Effect of thermal stress on immune cells density (number of cells per mL of haemolymph)**  
CT females: control females in Control Temperature (20°C), HT females: stressed females in High Temperature (28°C), CT males: control males in Control Temperature (20°C), HT males: stressed males in High Temperature (28°C)

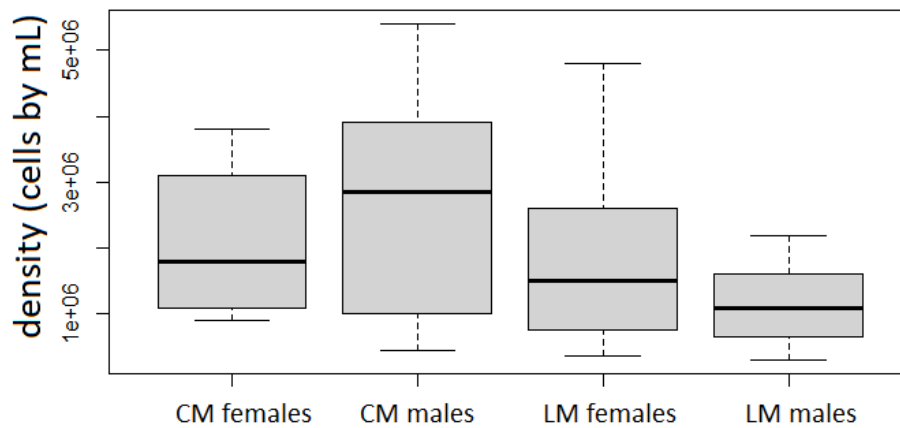

812

813

814

815

816

817

818

819

820

821

**Figure 2.C.2.: Effect of water stress on immune cells density (number of cells per mL of haemolymph)**  
CM females: control females in Control Moisture (moisture 80%), LM females: stressed females in Loss of Moisture (moisture 50%), CM males: control males in Control Moisture (moisture 80%), LM males: stressed males in Loss of Moisture (moisture 50%)

822 **2.D.  $\beta$ -galactosidase activity**

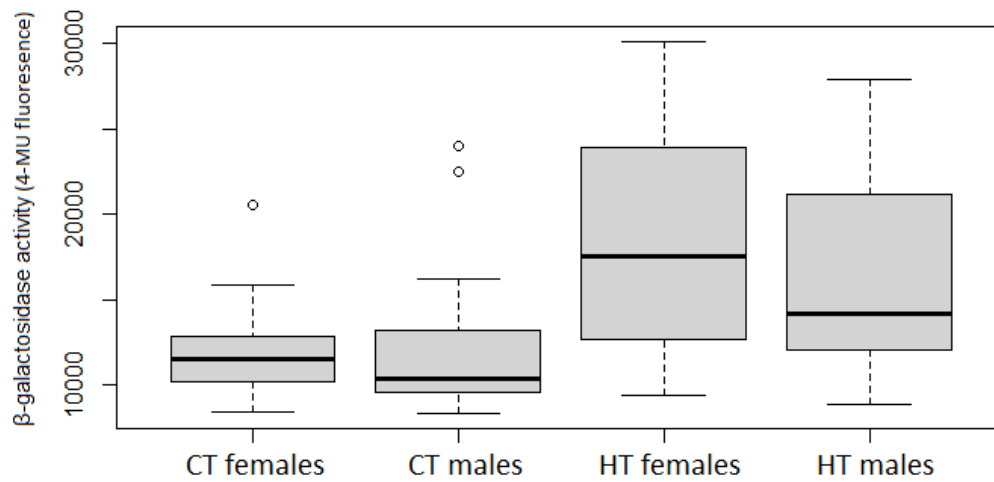

823

824

**Figure 2.D.1.: Effect of thermal stress on  $\beta$ -galactosidase activity**

825 *CT females: control females in Control Temperature (20°C), HT females: stressed females in High Temperature (28°C), CT*  
826 *males: control males in Control Temperature (20°C), HT males: stressed males in High Temperature (28°C)*

827

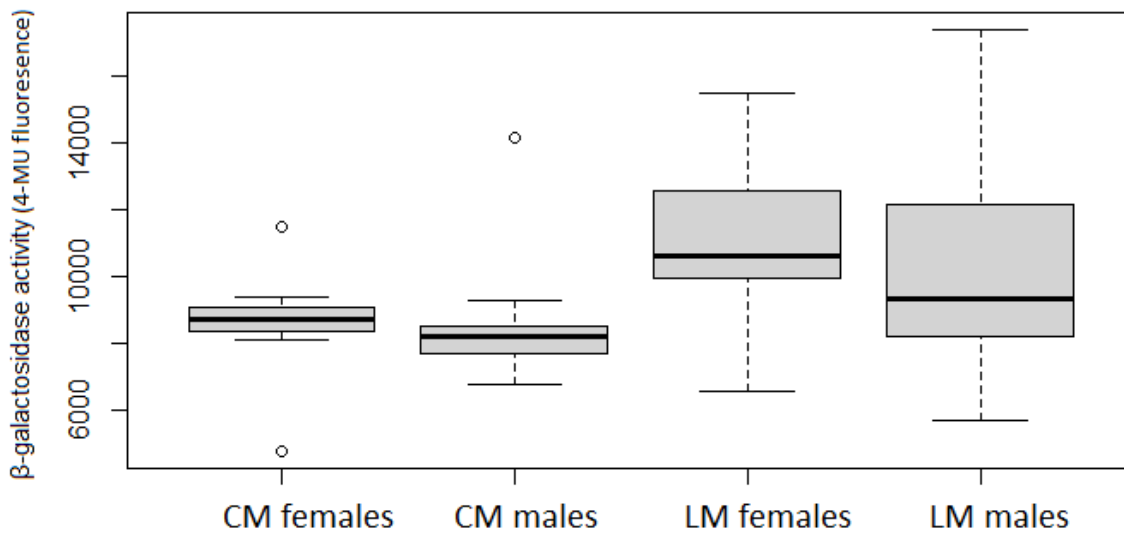

828

829

**Figure 2.D.2.: Effect of water stress on  $\beta$ -galactosidase activity**

830 *CM females: control females in Control Moisture (moisture 80%), LM females: stressed females in Loss of Moisture (moisture*  
831 *50%), CM males: control males in Control Moisture (moisture 80%), LM males: stressed males in Loss of Moisture (moisture*  
832 *50%)*

833

834
